# Supplementary material
Source: PubMed Central journal article supplement (PMC4067045)

# Vanadium-Catalyzed C(sp<sup>3</sup>)-H Fluorination Reactions

Ji-Bao Xia, Yuyong Ma, and Chuo Chen\*

## Electronic Supplementary Information

|                       |    |
|-----------------------|----|
| Material and Methods  | S2 |
| Characterization Data | S3 |
| NMR Spectra           | S7 |

## Materials and Methods

**General Information.** All reactions were performed in glassware under argon. Organic solutions were concentrated by rotary evaporator at ca. 30 mmHg unless otherwise noted. Flash column chromatography was performed as described by Still<sup>1</sup>, employing EMD silica gel 60 (230–400 mesh ASTM). TLC analyses were performed on EMD 250  $\mu\text{m}$  Silica Gel 60 F<sub>254</sub> plates and visualized by quenching of UV fluorescence ( $\lambda_{\text{max}} = 254 \text{ nm}$ ), or by staining ceric ammonium molybdate. <sup>1</sup>H and <sup>13</sup>C NMR spectra were recorded on a Varian Inova-500 or Inova-400. Chemical shifts for <sup>1</sup>H and <sup>13</sup>C NMR spectra are reported in ppm ( $\delta$ ) relative to the <sup>1</sup>H and <sup>13</sup>C signals in the solvent (CDCl<sub>3</sub>: 7.26, 77.00 ppm; C<sub>6</sub>D<sub>6</sub>:  $\delta$  7.16, 128.06 ppm; CD<sub>3</sub>CN:  $\delta$  1.94, 1.32 ppm) and the multiplicities are presented as follows: s = singlet, d = doublet, t = triplet, q = quartet, hept = heptet, m = multiplet. Crude <sup>1</sup>H and <sup>19</sup>F NMR spectra were recorded on an Inova-400 in CD<sub>3</sub>CN using fluorobenzene (<sup>19</sup>F NMR  $\delta$  -114.930) as an external standard. Mass spectra were acquired on an Agilent 6120 Single Quadrupole LC/MS or Agilent 7820A GC/5975 MSD.

**Materials.** Acetonitrile (anhydrous, 99.8%) was purchased from Sigma-Aldrich. Selectfluor (98+%) was purchased from Alfa Aesar. Vanadium(III) Oxide (95%) was purchased from Strem Chemicals Inc. Fluorobenzene ( $\geq 99.5\%$ ) was purchased from Fluka. Acetonitrile-*d*<sub>3</sub> (D, 99.8%) was purchased from Cambridge Isotope Laboratories, Inc.

**General procedure for the V<sub>2</sub>O<sub>3</sub>-catalyzed C(sp<sup>3</sup>)-H fluorination reaction.** To a 4 mL clear vial charged with vanadium(III) oxide (3.0 mg, 0.02 mmol, 10 mol%), Selectfluor (106.3 mg, 0.3 mmol, 1.5 equiv) was added anhydrous acetonitrile (2.0 mL), and the reaction substrate (0.2 mmol, 1.0 equiv). The reaction mixture was degassed three times by *Freeze-Pump-Thaw* cycles and stirred at room temperature for 6–48 h. The crude yield was determined by NMR using fluorobenzene as an external standard. Upon completion, the reaction mixture was poured into diethyl ether (20 mL), filtrated, concentrated and purified by silica gel flash column chromatography using diethyl ether/pentane as the eluent.

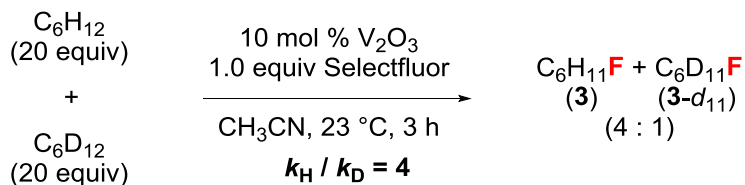

**The intermolecular kinetic isotope effect study.** To a 4 mL clear vial charged with vanadium(III) oxide (1.5 mg, 0.01 mmol) and Selectfluor (35.4 mg, 0.1 mmol, 1.0 equiv) was added acetonitrile (1.0 mL), cyclohexane (168.4 mg, 20.0 mmol, 20.0 equiv), and cyclohexane-*d*<sub>12</sub> (192.5 mg, 1.0 mmol, 20.0 equiv). The reaction mixture was then degassed three times by *freeze-pump-thaw* cycles and stirred at room temperature for 3 h. The ratio of **3:3-*d*<sub>11</sub>** was determined by <sup>19</sup>F NMR on a Varian Inova-400 NMR instrument to be 81:19.

<sup>1</sup> Still, W. C.; Kahn, M.; Mitra, A. *J. Org. Chem.* **1978**, *43*, 2923.

## Characterization Data

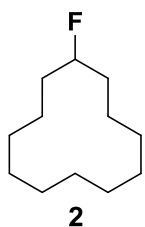

Hz, 1F).

**Fluorocyclododecane (2).**<sup>2</sup> Prepared from cyclododecane (33.6 mg, 0.2 mmol, 1.0 equiv) according to the general procedure (24 h), purified by flash column chromatography (pentane), and concentrated by rotary evaporator at ca. 100 mm Hg to give **2** (24.0 mg, 65% yield) as a colorless oil:  $R_f = 0.5$  (pentane).  $^1\text{H NMR}$  (400 MHz,  $\text{C}_6\text{D}_6$ )  $\delta$  4.59 (dddd,  $J = 47.3, 11.5, 7.2, 4.6$  Hz, 1H), 1.47–1.73 (m, 4H), 1.33–1.38 (m, 2H), 1.10–1.27 (m, 16H);  $^{13}\text{C NMR}$  (100 MHz,  $\text{C}_6\text{D}_6$ )  $\delta$  91.8 (d,  $J = 167.0$  Hz), 30.3 (d,  $J = 21.2$  Hz), 24.4, 24.1, 23.5, 23.4, 20.8 (d,  $J = 6.7$  Hz);  $^{19}\text{F NMR}$  (376 MHz,  $\text{C}_6\text{D}_6$ )  $\delta$  -176.12 (dtt,  $J = 47.4, 23.7, 15.5$

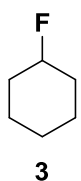

**Fluorocyclohexane (3).**<sup>3</sup> Prepared from cyclohexane (84.2 mg, 1.0 mmol, 5.0 equiv) according to the general procedure (20 h) to give **3** (70% NMR yield).  $^{19}\text{F NMR}$  (376 MHz,  $\text{CD}_3\text{CN}$ )  $\delta$  -172.30 (brs, 1F).

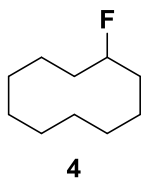

**Fluorocyclodecane (4).**<sup>4</sup> Prepared from cyclodecane (140.3 mg, 1.0 mmol, 5.0 equiv) according to the general procedure (20 h) to give **4** (19.2 mg, 61% yield).  $^1\text{H NMR}$  (400 MHz,  $\text{C}_6\text{D}_6$ )  $\delta$  4.66 (dtt,  $J = 46.4, 7.7, 4.1$  Hz, 1H), 1.63–1.87 (m, 4H), 1.41–1.51 (m, 2H), 1.26–1.37 (m, 12H);  $^{13}\text{C NMR}$  (100 MHz,  $\text{C}_6\text{D}_6$ )  $\delta$  93.5 (d,  $J = 165.7$  Hz), 31.1 (d,  $J = 21.9$  Hz), 25.3, 25.1, 24.0, 21.8 (d,  $J = 7.7$  Hz);  $^{19}\text{F NMR}$  (376 MHz,  $\text{C}_6\text{D}_6$ )  $\delta$  -165.56 (dtt,  $J = 46.6, 26.6, 13.7$  Hz, 1F).

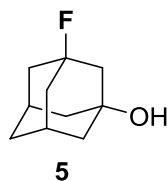

**3-Fluoroadamantan-1-ol (5).**<sup>2</sup> Prepared from 1-adamantanol (30.4 mg, 0.2 mmol, 1.0 equiv) according to the general procedure (20 h) and purified by flash column chromatography (15% ethyl acetate/hexanes) to give **5** (25.1 mg, 74% yield) as a colorless solid:  $R_f = 0.3$  (30% ethyl acetate/hexanes).  $^1\text{H NMR}$  (400 MHz,  $\text{CDCl}_3$ )  $\delta$  2.36–2.38 (m, 2H), 1.89–1.91 (m, 2H), 1.80–1.83 (m, 4H), 1.60–1.69 (m, 5H), 1.49–1.50 (m, 2H);  $^{13}\text{C NMR}$  (100 MHz,  $\text{CDCl}_3$ )  $\delta$  93.3 (d,  $J = 185.7$  Hz), 71.0 (d,  $J = 11.8$  Hz), 50.4 (d,  $J = 17.1$  Hz), 43.8 (d,  $J = 1.6$  Hz), 41.3 (d,  $J = 17.5$  Hz), 34.4 (d,  $J = 2.1$  Hz), 31.4 (d,  $J = 10.3$  Hz);  $^{19}\text{F NMR}$  (376 MHz,  $\text{CDCl}_3$ )  $\delta$  -133.24 (m, 1F).

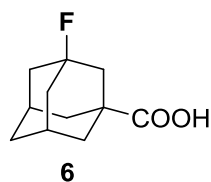

**3-Fluoroadamantan-1-carboxylic acid (6).**<sup>2</sup> Prepared from 1-Adamantanecarboxylic acid (36.0 mg, 0.2 mmol, 1.0 equiv) according to the general procedure (20 h) and purified by flash column chromatography (15% ethyl acetate/hexanes) to give **6** (27.9 mg, 70% yield) as a colorless solid:  $R_f = 0.2$  (30% ethyl acetate/hexanes).  $^1\text{H NMR}$  (400 MHz,  $\text{CDCl}_3$ )  $\delta$  11.7 (brs, 1H), 2.36–2.37 (m, 2H), 2.03–2.05 (m, 2H), 1.79–1.89 (m, 8H), 1.60–1.62 (m, 2H);  $^{13}\text{C NMR}$  (100 MHz,  $\text{CDCl}_3$ )  $\delta$  181.5, 91.0 (d,  $J = 184.2$  Hz), 43.7 (d,  $J = 10.4$  Hz), 42.3 (d,  $J = 20.3$  Hz), 40.7 (d,  $J = 17.5$  Hz), 36.3 (d,  $J = 1.9$  Hz), 33.7 (d,  $J = 1.9$  Hz), 29.7 (d,  $J = 10.0$  Hz);  $^{19}\text{F NMR}$  (376 MHz,  $\text{CDCl}_3$ )  $\delta$  -132.83 (s, 1F).

<sup>2</sup> Amaoka, Y.; Nagatomo, M.; Inoue, M. *Org. Lett.* **2013**, *15*, 2160.

<sup>3</sup> Chambers, R. D.; Kenwright, A. M.; Parsons, M.; Sandford, G.; Moilliet, J. S. *J. Chem. Soc. Perkin Trans. 1*, 2002, 2190.

<sup>4</sup> Bloom, S.; Pitts, C. R.; Miller, D. C.; Haselton, N.; Holl, M. G.; Urheim, E.; Lectka, T. *Angew. Chem. Int. Ed.* **2012**, *51*, 10580.

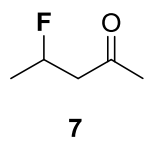

7

**4-Fluoropentan-2-one (7).** Prepared from 2-pentanone (17.2 mg, 0.2 mmol, 1.0 equiv) according to the general procedure (20 h) to give **7** (47% NMR yield).  $^1\text{H}$  NMR (400 MHz,  $\text{CD}_3\text{CN}$ )  $\delta$  4.95-5.14 (m, 1H), 2.81 (ddd,  $J = 16.8, 15.2, 7.9$  Hz, 1H), 2.62 (ddd,  $J = 30.4, 16.8, 4.3$  Hz, 1H), 2.09 (s, 3H), 1.29 (dd,  $J = 24.2, 6.2$  Hz, 3H);  $^{19}\text{F}$  NMR (376 MHz,  $\text{CD}_3\text{CN}$ )  $\delta$  -173.37 (ddqd,  $J = 48.3, 30.4, 24.2, 15.2$  Hz, 1F).

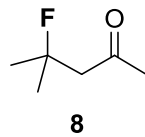

8

**4-Fluoro-4-methylpentan-2-one (8).**<sup>5</sup> Prepared from 4-methylpentan-2-one (20.0 mg, 0.2 mmol, 1.0 equiv) according to the general procedure (20 h) to give **8** (78% NMR yield).  $^1\text{H}$  NMR (400 MHz,  $\text{CD}_3\text{CN}$ )  $\delta$  2.75 (d,  $J = 17.5$  Hz, 2H), 2.10 (s, 3H), 1.37 (d,  $J = 22.0$  Hz, 6H);  $^{19}\text{F}$  NMR (376 MHz,  $\text{CD}_3\text{CN}$ )  $\delta$  -133.28 (heptt,  $J = 22.0, 17.5$  Hz, 1F).

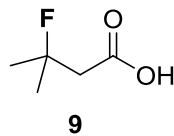

9

**3-Fluoro-3-methylbutanoic acid (9).** Prepared from methyl 3-methylbutanoic acid (20.4 mg, 0.2 mmol, 1.0 equiv) according to the general procedure (20 h), purified by flash column chromatography (20% ethyl acetate/hexanes), and concentrated by rotary evaporator at ca. 100 mm Hg to give **9** (15.2 mg, 63% yield) as a colorless oil:  $R_f = 0.2$  (30% ethyl acetate/hexanes).  $^1\text{H}$  NMR (400 MHz,  $\text{C}_6\text{D}_6$ )  $\delta$  2.33 (d,  $J = 15.6$  Hz, 2H), 1.21 (d,  $J = 21.3$  Hz, 6H);  $^{13}\text{C}$  NMR (100 MHz,  $\text{C}_6\text{D}_6$ )  $\delta$  176.0 (d,  $J = 10.3$  Hz), 92.4 (d,  $J = 170.2$  Hz), 45.6 (d,  $J = 26.3$  Hz), 26.6 (d,  $J = 24.0$  Hz);  $^{19}\text{F}$  NMR (376 MHz,  $\text{C}_6\text{D}_6$ )  $\delta$  -134.40 (heptt,  $J = 21.7, 16.2$  Hz, 1F); MS(ESI) calcd for  $\text{C}_5\text{H}_9\text{FO}_2\text{Na}$  ( $\text{M}+\text{Na}$ )<sup>+</sup> 143.1, found 143.1.

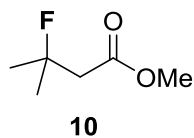

10

**Methyl 3-fluoro-3-methylbutanoate (10).** Prepared from methyl 3-methylbutanoate (23.2 mg, 0.2 mmol, 1.0 equiv) according to the general procedure (20 h) to give **10** (85% NMR yield).  $^1\text{H}$  NMR (400 MHz,  $\text{CD}_3\text{CN}$ )  $\delta$  3.61 (s, 3H), 2.63 (d,  $J = 17.7$  Hz, 2H), 1.42 (d,  $J = 21.7$  Hz, 6H);  $^{19}\text{F}$  NMR (376 MHz,  $\text{CD}_3\text{CN}$ )  $\delta$  -134.91 (heptt,  $J = 21.7, 17.7$  Hz, 1F).

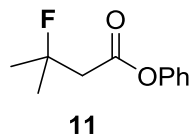

11

**Phenyl 3-fluoro-3-methylbutanoate (11).** Prepared from phenyl 3-methylbutanoate (35.3 mg, 0.2 mmol, 1.0 equiv) according to the general procedure (20 h) to give **11** (12% NMR yield).  $^{19}\text{F}$  NMR (376 MHz,  $\text{CD}_3\text{CN}$ )  $\delta$  -135.27 (heptt,  $J = 21.6, 17.7$  Hz, 1F).

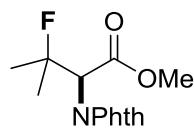

12

**(2R)-N-Phthaloyl-3-fluorovaline methyl ester (12).** Prepared from (*S*)-*N*-phthaloylvaline methyl ester (52.2 mg, 0.2 mmol, 1.0 equiv) according to the general procedure (18 h) and purified by flash column chromatography (10% ethyl acetate/hexanes) to give **12** (25.5 mg, 46% yield) as a colorless oil:  $R_f = 0.2$  (20% ethyl acetate/hexanes).  $^1\text{H}$  NMR (400 MHz,  $\text{CDCl}_3$ )  $\delta$  7.89 (dd,  $J = 5.5, 3.0$  Hz, 2H), 7.76 (dd,  $J = 5.5, 3.1$  Hz, 2H), 4.99 (d,  $J = 10.2$  Hz, 1H), 3.72 (s, 3H), 1.69 (d,  $J = 22.8$  Hz, 3H), 1.55 (d,  $J = 22.5$  Hz, 3H);  $^{13}\text{C}$  NMR (100 MHz,  $\text{CDCl}_3$ )  $\delta$  167.3, 166.7 (d,  $J = 10.5$  Hz), 134.3, 131.7, 123.7, 95.6 (d,  $J = 173.0$  Hz), 57.7 (d,  $J = 25.9$  Hz), 52.5, 26.3 (d,  $J = 22.8$  Hz), 23.8 (d,  $J = 23.7$  Hz);  $^{19}\text{F}$  NMR (376 MHz,  $\text{CDCl}_3$ )  $\delta$  -136.52 (dq,  $J = 10.2, 22.5, 22.8$  Hz, 1F); MS(ESI)<sup>+</sup> calcd for  $\text{C}_{14}\text{H}_{14}\text{FNO}_4\text{Na}$  ( $\text{M}+\text{Na}$ )<sup>+</sup> 302.1, found 302.1.

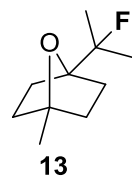

13

**1-(2-Fluoropropan-2-yl)-4-methyl-7-oxabicyclo[2.2.1]heptane (13).** Prepared from 1,4-cineole (30.9 mg, 0.2 mmol, 1.0 equiv) according to the general procedure (24 h), purified by flash column chromatography (2% diethyl ether/pentane), and concentrated by rotary evaporator at ca. 100 mm Hg to give **13** (18.1 mg, 53% yield) as a colorless oil:  $R_f = 0.4$

<sup>5</sup> Shellhamer, D. F.; Anstine, D. T.; Gallego, K. M.; Ganesh, B. R.; Hanson, A. A.; Hanson, K. A.; Henderson, R. D.; Prince, J. M.; Heasley, V. L. *J. Chem. Soc., Perkin Trans. 2*, **1995**, 861.

(5% diethyl ether/pentane).  $^1\text{H}$  NMR (400 MHz,  $\text{C}_6\text{D}_6$ )  $\delta$  1.76–1.84 (m, 2H), 1.24–1.46 (m, 15H);  $^{13}\text{C}$  NMR (100 MHz,  $\text{C}_6\text{D}_6$ )  $\delta$  94.9 (d,  $J = 172.0$  Hz), 89.6 (d,  $J = 21.1$  Hz), 83.7, 37.2, 32.5 (d,  $J = 5.3$  Hz), 23.5 (d,  $J = 25.6$  Hz), 21.3;  $^{19}\text{F}$  NMR (376 MHz,  $\text{C}_6\text{D}_6$ )  $\delta$  -146.24 (hept,  $J = 21.5$  Hz, 1F); MS(EI) calcd for  $\text{C}_{12}\text{H}_{17}\text{FO}$  ( $\text{M}$ ) $^+$  172.1, found 172.2.

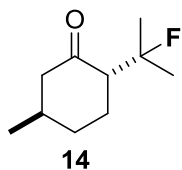

**(2*R*,5*R*)-2-(2-Fluoropropan-2-yl)-5-methylcyclohexanone (14).** Prepared from (-)-menthone (30.9 mg, 0.2 mmol, 1.0 equiv) according to the general procedure (30 h), purified by preparative TLC [(the plate was pretreated with ammonium (1 mL, 7M in methanol) in hexane (50 mL)] (5% ethyl acetate/hexanes), and concentrated by rotary evaporator at ca. 100 mm Hg to give **14** (26.0 mg, 75% yield) as a colorless oil:  $R_f = 0.4$

(5% ethyl acetate/hexanes).  $^1\text{H}$  NMR (400 MHz,  $\text{C}_6\text{D}_6$ )  $\delta$  2.27–2.33 (m, 1H), 2.09–2.19 (m, 2H), 1.55 (d,  $J = 23.2$  Hz, 3H), 1.44 (d,  $J = 22.8$  Hz, 3H), 1.31–1.45 (m, 3H), 1.18–1.29 (m, 1H), 0.78–0.88 (m, 1H), 0.62 (d,  $J = 6.0$  Hz, 3H);  $^{13}\text{C}$  NMR (100 MHz,  $\text{C}_6\text{D}_6$ )  $\delta$  207.9 (d,  $J = 11.0$  Hz), 95.3 (d,  $J = 165.5$  Hz), 58.8 (d,  $J = 22.5$  Hz), 51.2 (d,  $J = 4.2$  Hz), 35.7, 33.6, 27.7 (d,  $J = 4.8$  Hz), 27.5 (d,  $J = 23.3$  Hz), 22.3 (d,  $J = 23.3$  Hz), 22.1;  $^{19}\text{F}$  NMR (376 MHz,  $\text{C}_6\text{D}_6$ )  $\delta$  -133.75 (heptd,  $J = 23.0, 7.5$  Hz, 1F); MS(ESI) calcd for  $\text{C}_{10}\text{H}_{17}\text{FONa}$  ( $\text{M}+\text{Na}$ ) $^+$  195.1, found 195.1.

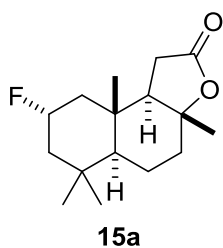

**2 $\alpha$ -Fluorosclareolide (15a).**<sup>6</sup> Prepared from sclareolide (50.1 mg, 0.2 mmol, 1.5 equiv) according to the general procedure (48 h) to give 2 $\alpha$ -fluorosclareolide **15a** (56% NMR yield), 2 $\beta$ -fluorosclareolide **15b** (6% NMR yield) and 3 $\alpha$ -fluorosclareolide **15c** (16% NMR yield). Purified by flash column chromatography (10% ethyl acetate/hexanes) to give a mixture of all three isomers (40.6 mg, 76% yield) as a colorless solid:  $R_f = 0.3$  (20% ethyl acetate/hexanes). **15a**:  $^{19}\text{F}$  NMR (376 MHz,  $\text{CD}_3\text{CN}$ )  $\delta$  -179.22 (dddd,  $J = 48.0, 11.1, 11.1, 5.5, 5.5$  Hz, 1F); **15b**:  $^{19}\text{F}$

NMR (376 MHz,  $\text{CD}_3\text{CN}$ )  $\delta$  -172.05 (m, 1F); **15c**:  $^{19}\text{F}$  NMR (376 MHz,  $\text{CD}_3\text{CN}$ )  $\delta$  -187.44 (ddd,  $J = 47.8, 47.7, 11.9$  Hz, 1F).

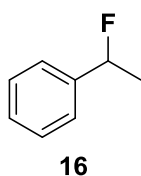

**(1-Fluoroethyl)benzene (16).**<sup>7</sup> Prepared from ethylbenzene (21.2 mg, 0.2 mmol, 1.0 equiv) according to the general procedure (24 h) to give **2** (67% NMR yield).  $^{19}\text{F}$  NMR (376 MHz,  $\text{CD}_3\text{CN}$ )  $\delta$  -166.38 (dq,  $J = 47.8, 23.9$  Hz, 1F).

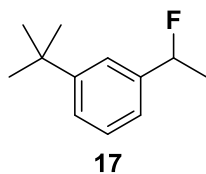

**1-(*tert*-Butyl)-3-(1-fluoroethyl)benzene (17).**<sup>7</sup> Prepared from 1-(*tert*-butyl)-3-ethylbenzene (32.5 mg, 0.2 mmol, 1.0 equiv) according to the general procedure (48 h) and purified by flash column chromatography (1% diethyl ether/pentane) to give **3** (17.0 mg, 47% yield) as a colorless oil:  $R_f = 0.3$  (1% diethyl ether/pentane).  $^1\text{H}$  NMR (400 MHz,  $\text{CDCl}_3$ )  $\delta$  7.31–7.39 (m, 2H), 7.29–7.34 (m, 1H), 7.17–7.20 (m, 1H), 5.64 (dq,  $J = 47.7, 6.4$  Hz, 1H), 1.67 (dd,  $J = 23.9, 6.4$  Hz, 3H), 1.33 (s, 9H);  $^{19}\text{F}$  NMR (376 MHz,  $\text{CDCl}_3$ )  $\delta$  -165.97 (dq,  $J = 47.8, 23.9$  Hz, 1F).

<sup>6</sup> Liu, W.; Huang, X.; Cheng, M.-J.; Nielsen, R. J.; Goddard III, W. A.; Groves, J. T. *Science* **2012**, 337, 1322.

<sup>7</sup> Xia, J.-B.; Zhu, C.; Chen, C. *J. Am. Chem. Soc.*, 2013, **135**, 17494.

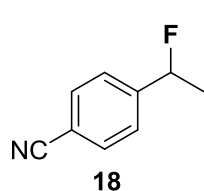

**4-(1-Fluoroethyl)benzonitrile (18).**<sup>7</sup> Prepared from 4-ethylbenzonitrile (26.2 mg, 0.2 mmol, 1.0 equiv) according to the general procedure (24 h) and purified by flash column chromatography (3% diethyl ether/pentane) to give **18** (7.2 mg, 24% yield) as a colorless oil:  $R_f = 0.3$  (3% diethyl ether/pentane).  $^1\text{H NMR}$  (400 MHz,  $\text{CDCl}_3$ )  $\delta$  7.68 (d,  $J = 8.0$  Hz, 2H), 7.45 (d,  $J = 8.0$  Hz, 2H), 5.67 (dq,  $J = 47.4, 6.5$  Hz, 1H), 1.64 (dd,  $J = 24.0, 6.5$  Hz, 3H);  $^{19}\text{F NMR}$  (376 MHz,  $\text{CDCl}_3$ )  $\delta$  -172.73 (dq,  $J = 47.9, 24.0$

Hz, 1F).

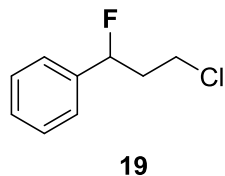

**(3-Chloro-1-fluoropropyl)benzene (19).**<sup>7</sup> Prepared from (3-chloropropyl)benzene (30.9 mg, 0.2 mmol, 1.0 equiv) according to the general procedure (24 h) and purified by preparative TLC (1% ethyl acetate/hexanes) to give **19** (12.0 mg, 35% yield) as a colorless oil:  $R_f = 0.4$  (1% ethyl acetate/hexanes).  $^1\text{H NMR}$  (400 MHz,  $\text{C}_6\text{D}_6$ )  $\delta$  7.03–7.07 (m, 5H), 5.42 (ddd,  $J = 48.0, 9.0, 3.9$  Hz, 1H), 3.26–3.33 (m, 1H),

3.04–3.09 (m, 1H), 1.92–2.04 (m, 1H), 1.64–1.80 (m, 1H);  $^{19}\text{F NMR}$  (376 MHz,  $\text{C}_6\text{D}_6$ )  $\delta$  -179.53 (ddd,  $J = 48.2, 31.0, 13.5$  Hz, 1F).

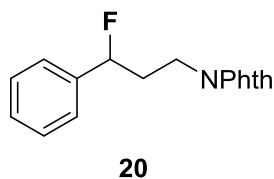

**N-Phthaloyl 3-fluoro-3-phenylpropylamine (20).**<sup>7</sup> Prepared from 2-(3-phenylpropyl)isoindoline-1,3-dione (53.0 mg, 0.2 mmol, 1.0 equiv) according to the general procedure (6 h) and purified by preparative TLC (20% ethyl acetate/hexanes) to give **20** (24.5 mg, 43% yield) as a colorless oil:  $R_f = 0.4$  (20% ethyl acetate/hexanes).  $^1\text{H NMR}$  (400 MHz,  $\text{C}_6\text{D}_6$ )  $\delta$  7.43–7.45 (m, 2H),

6.96–7.11 (m, 5H), 6.88–6.90 (m, 2H), 5.28 (ddd,  $J = 48.1, 9.2, 4.0$  Hz, 1H), 3.61–3.76 (m, 2H), 2.12–2.25 (m, 1H), 1.87–2.02 (m, 1H);  $^{19}\text{F NMR}$  (376 MHz,  $\text{C}_6\text{D}_6$ )  $\delta$  -176.15 (ddd,  $J = 47.4, 30.7, 16.2$  Hz, 1F).

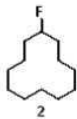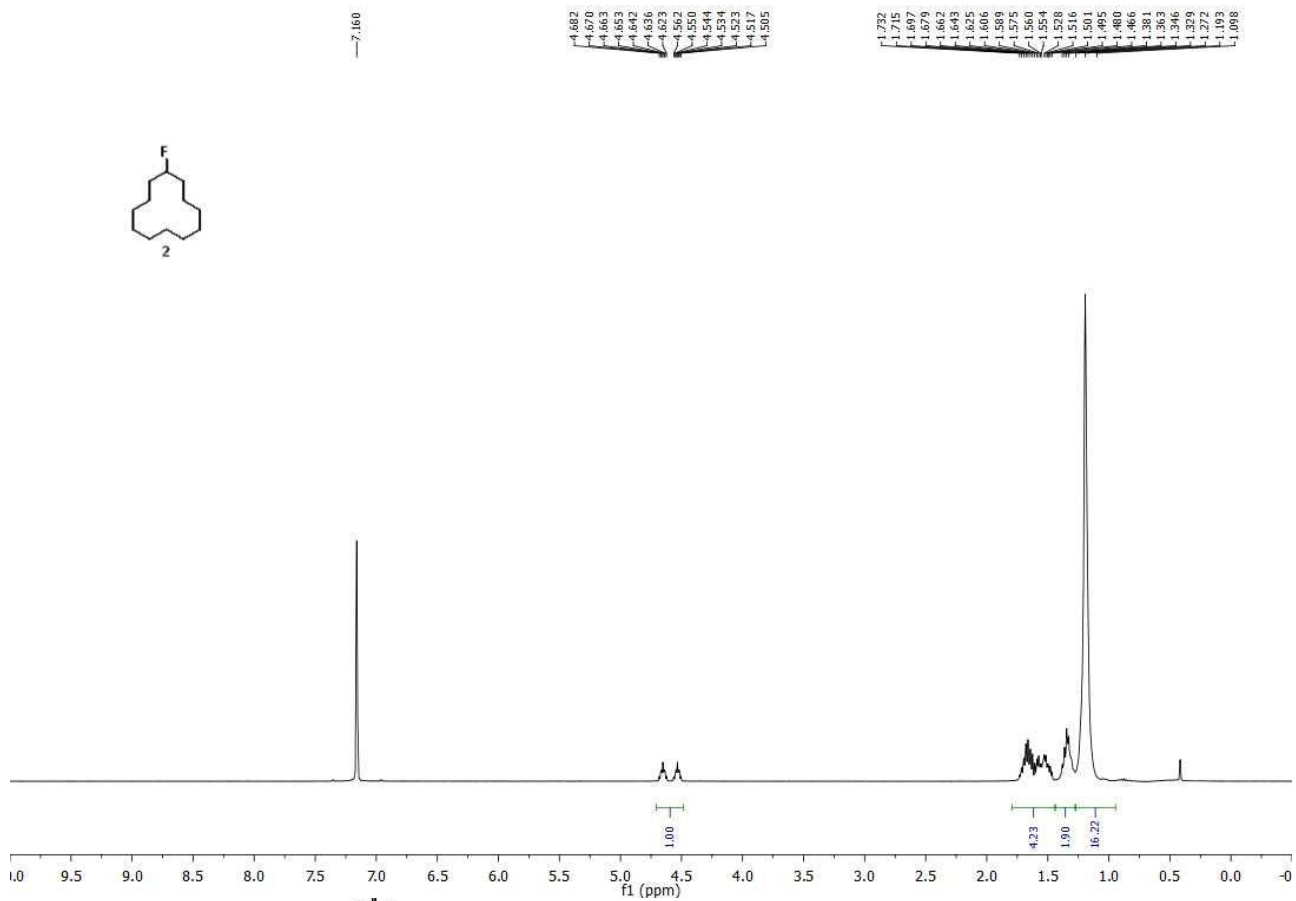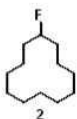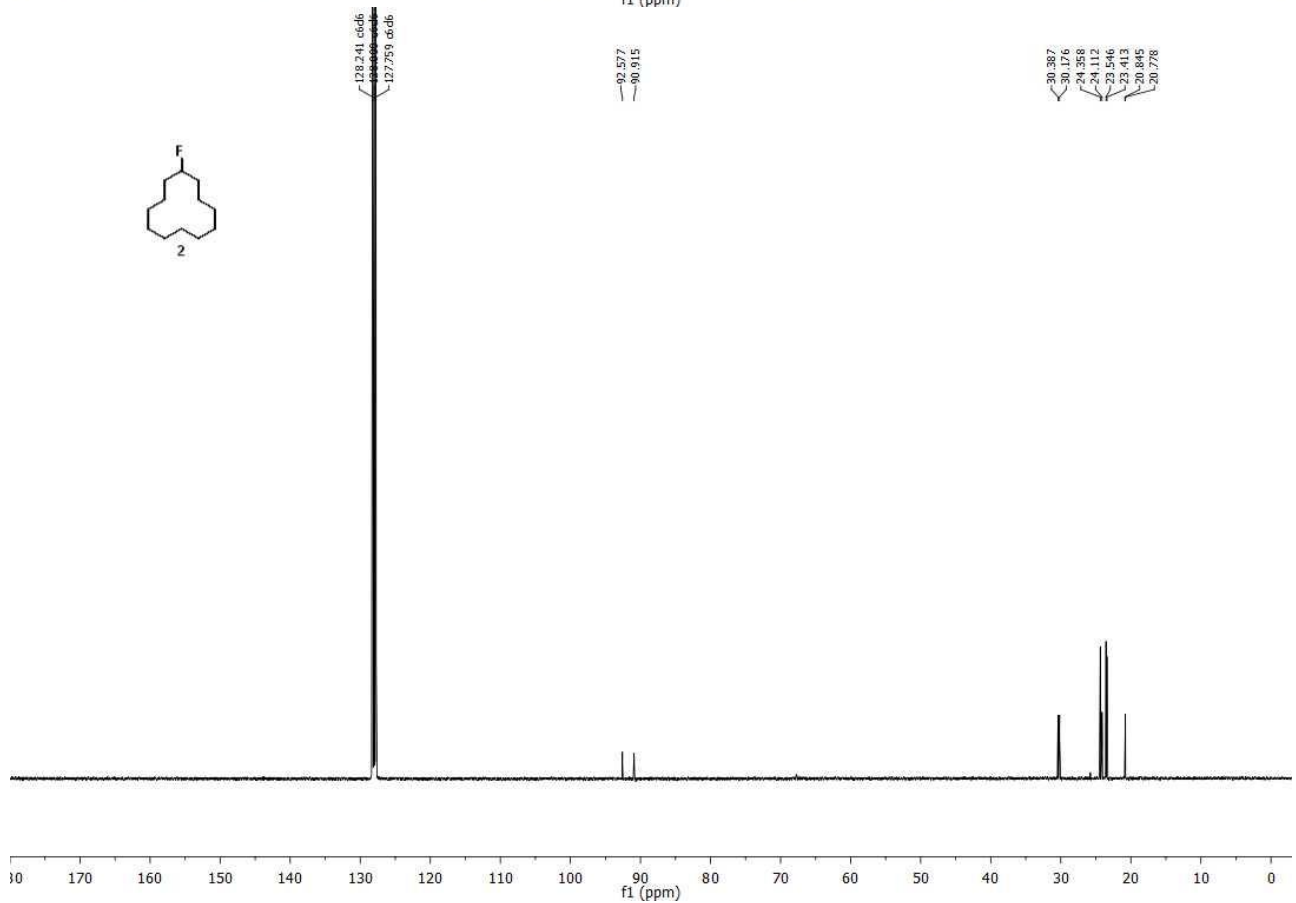

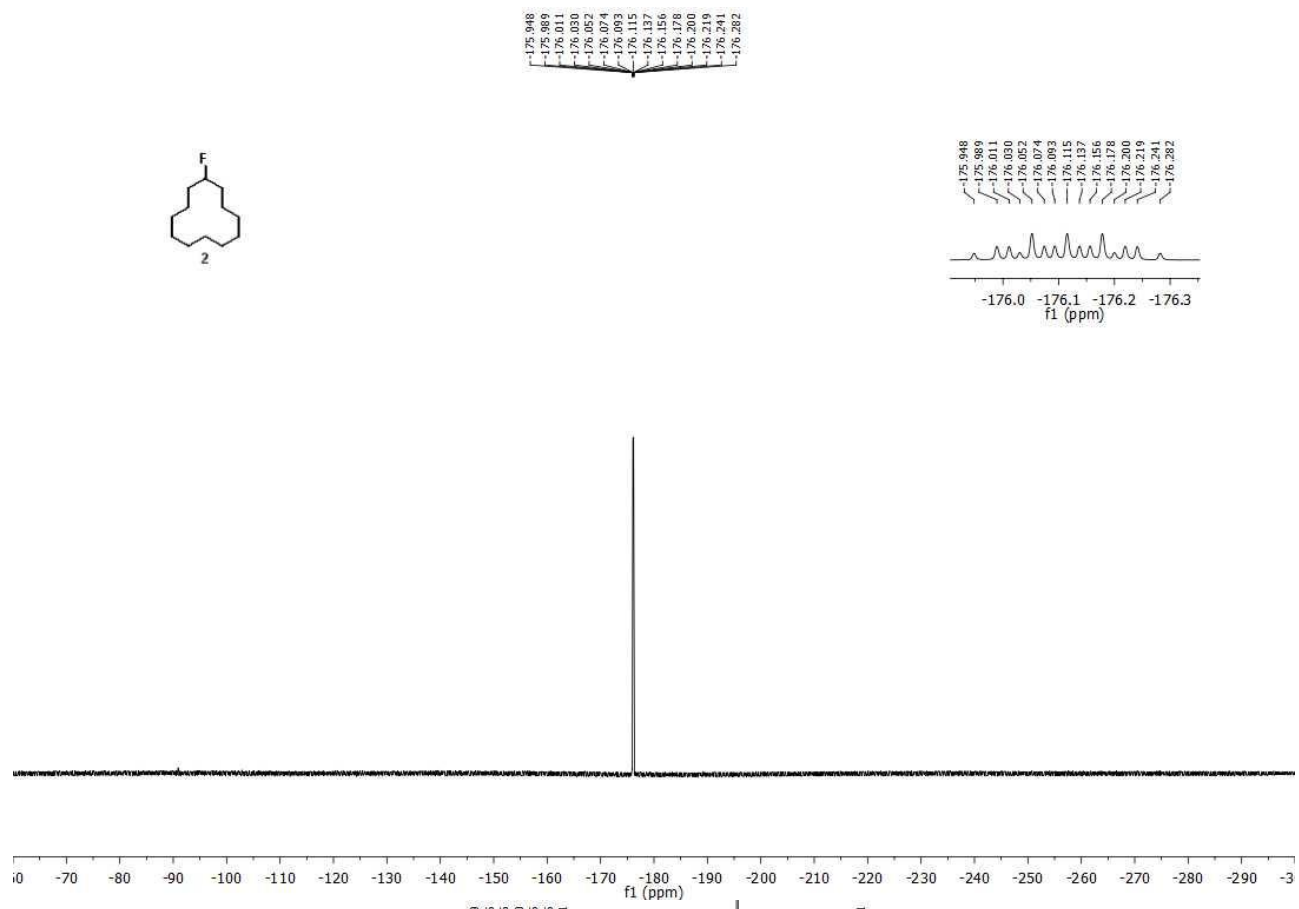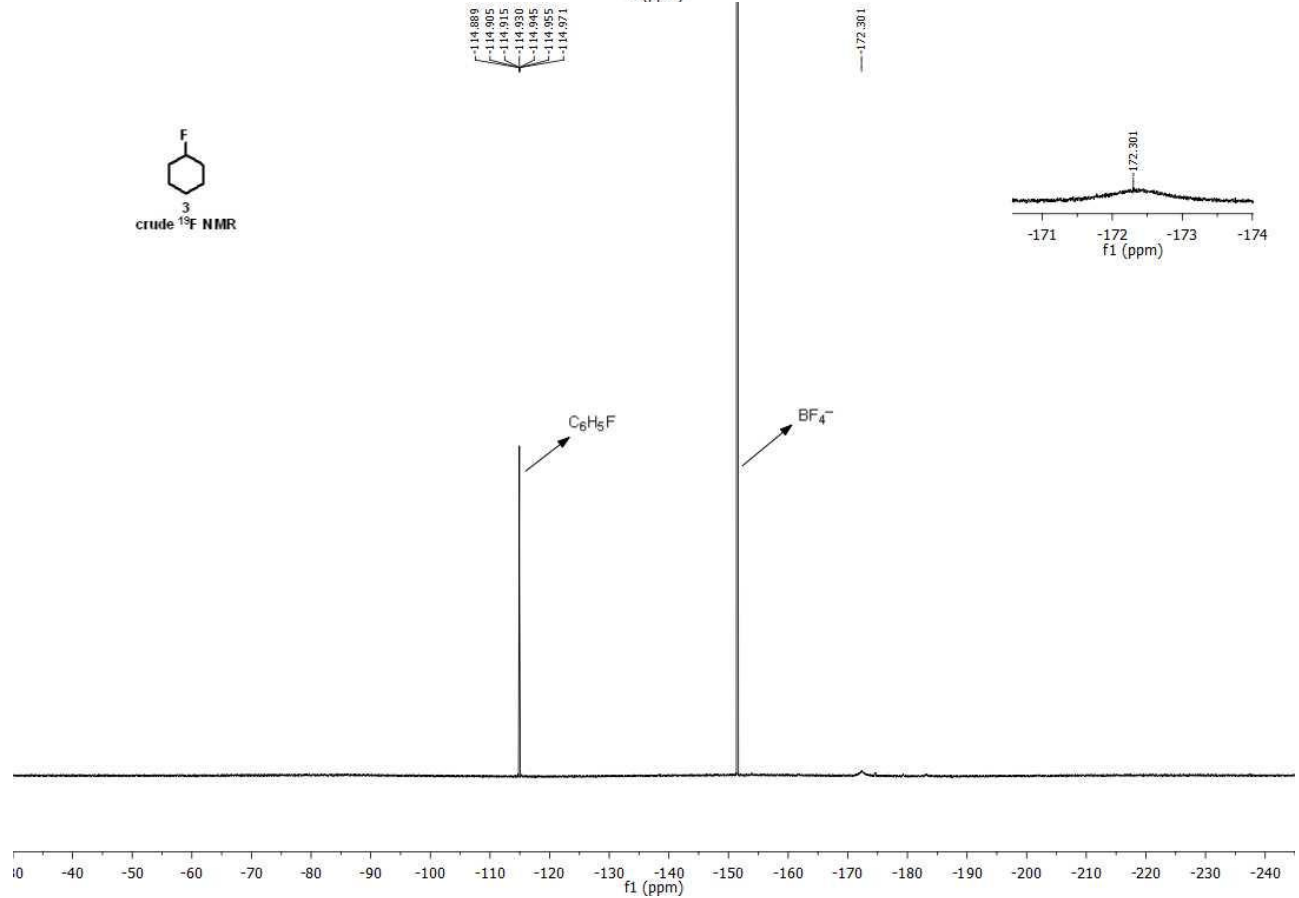



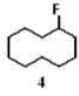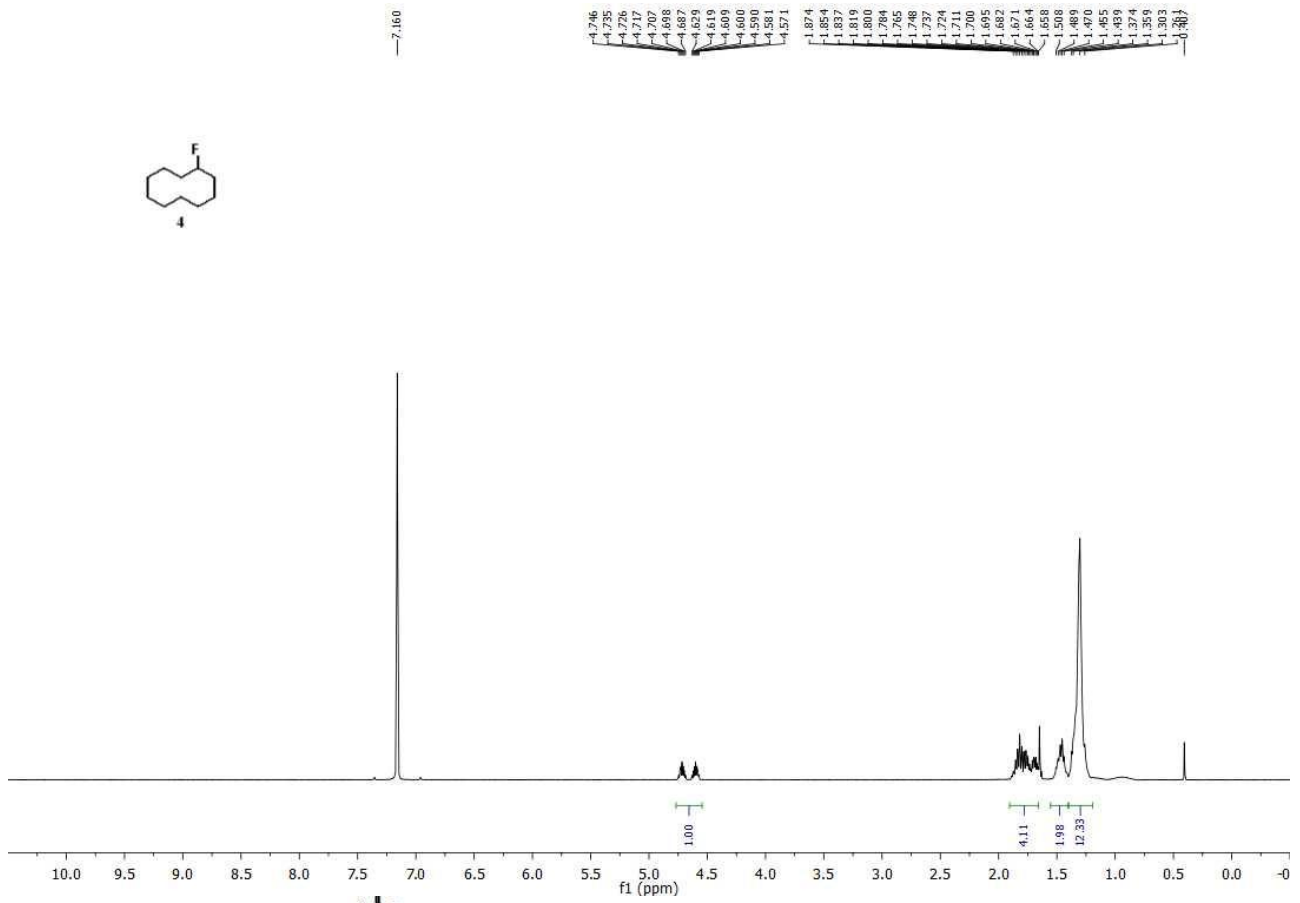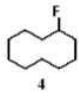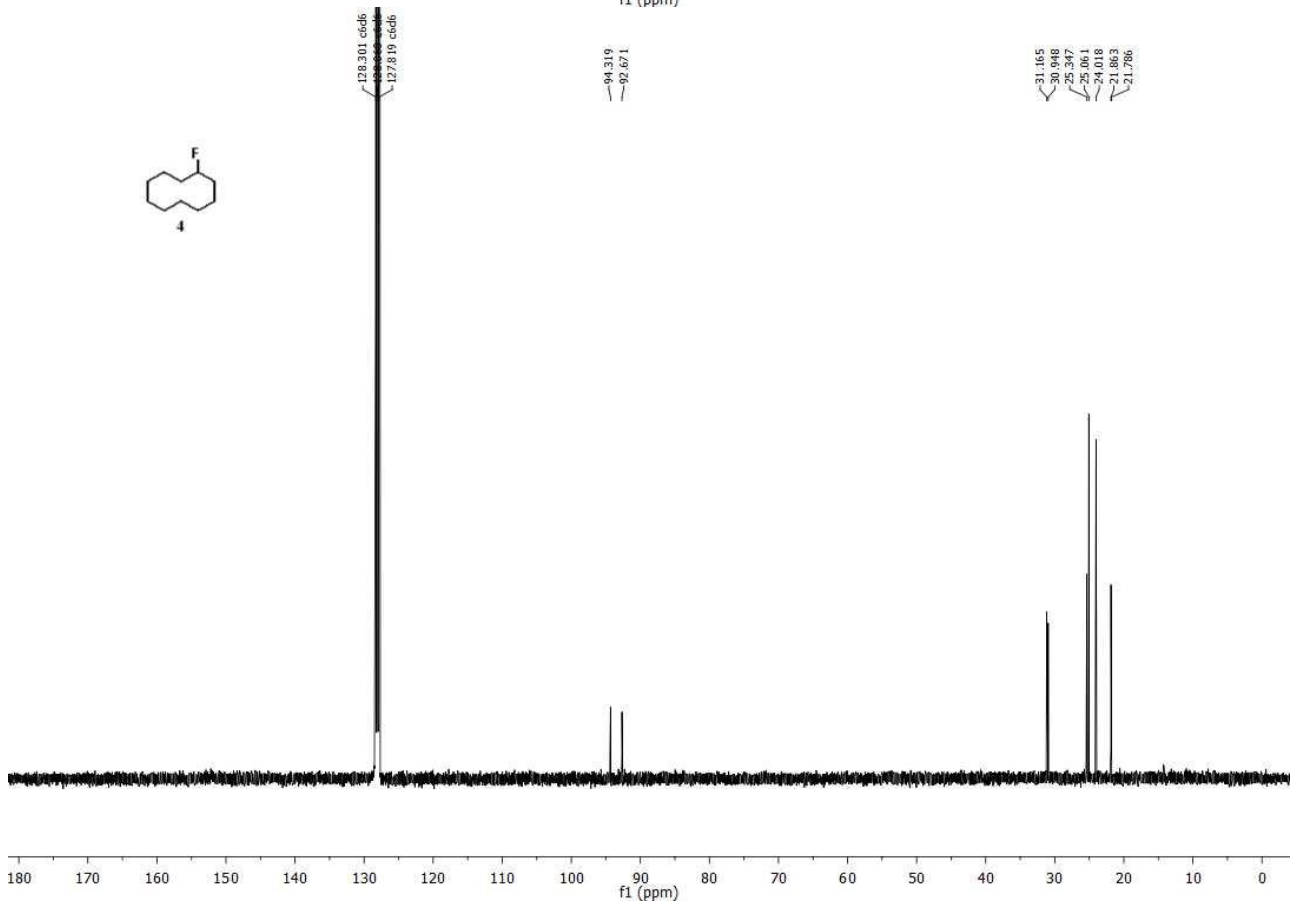

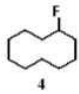

165.394  
165.480  
165.465  
165.500  
165.517  
165.527  
165.554  
165.570  
165.588  
165.607  
165.624  
165.660  
165.694  
165.731

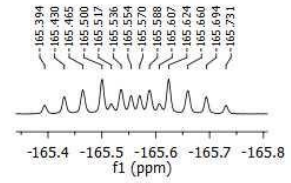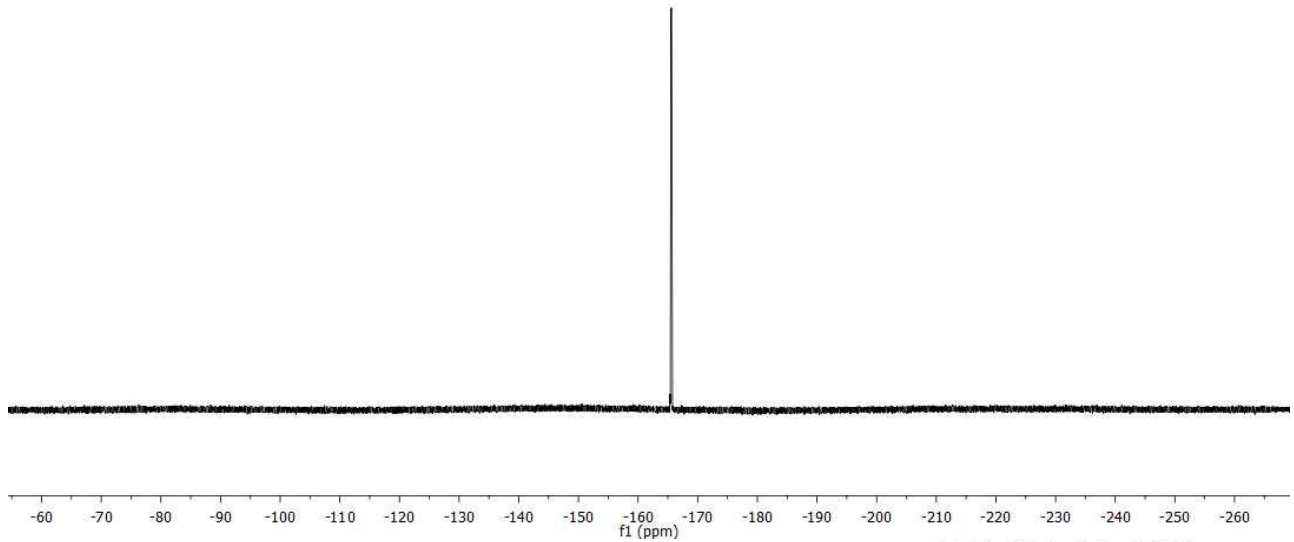

-7.260

2.376  
2.370  
2.364  
1.907  
1.893  
1.825  
1.816  
1.811  
1.803  
1.689  
1.661  
1.603  
1.502  
1.495  
1.487

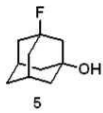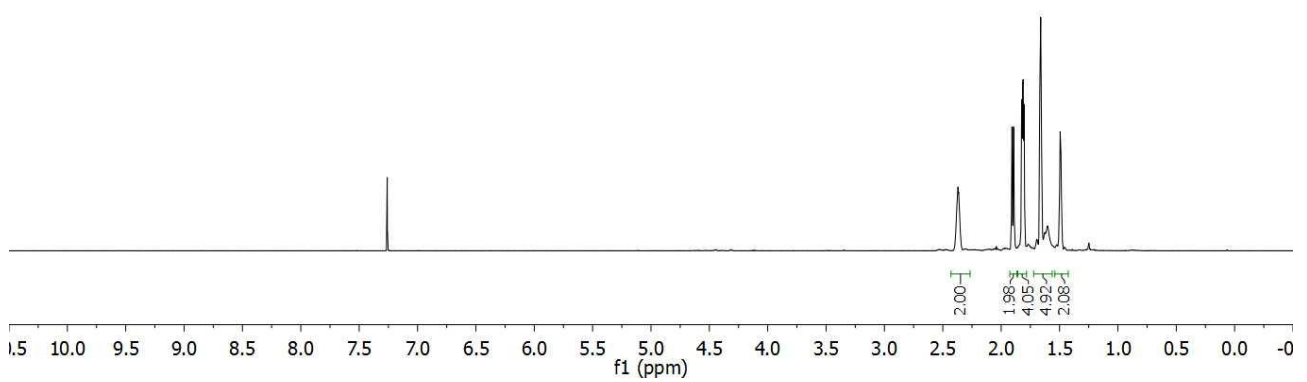

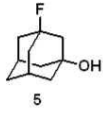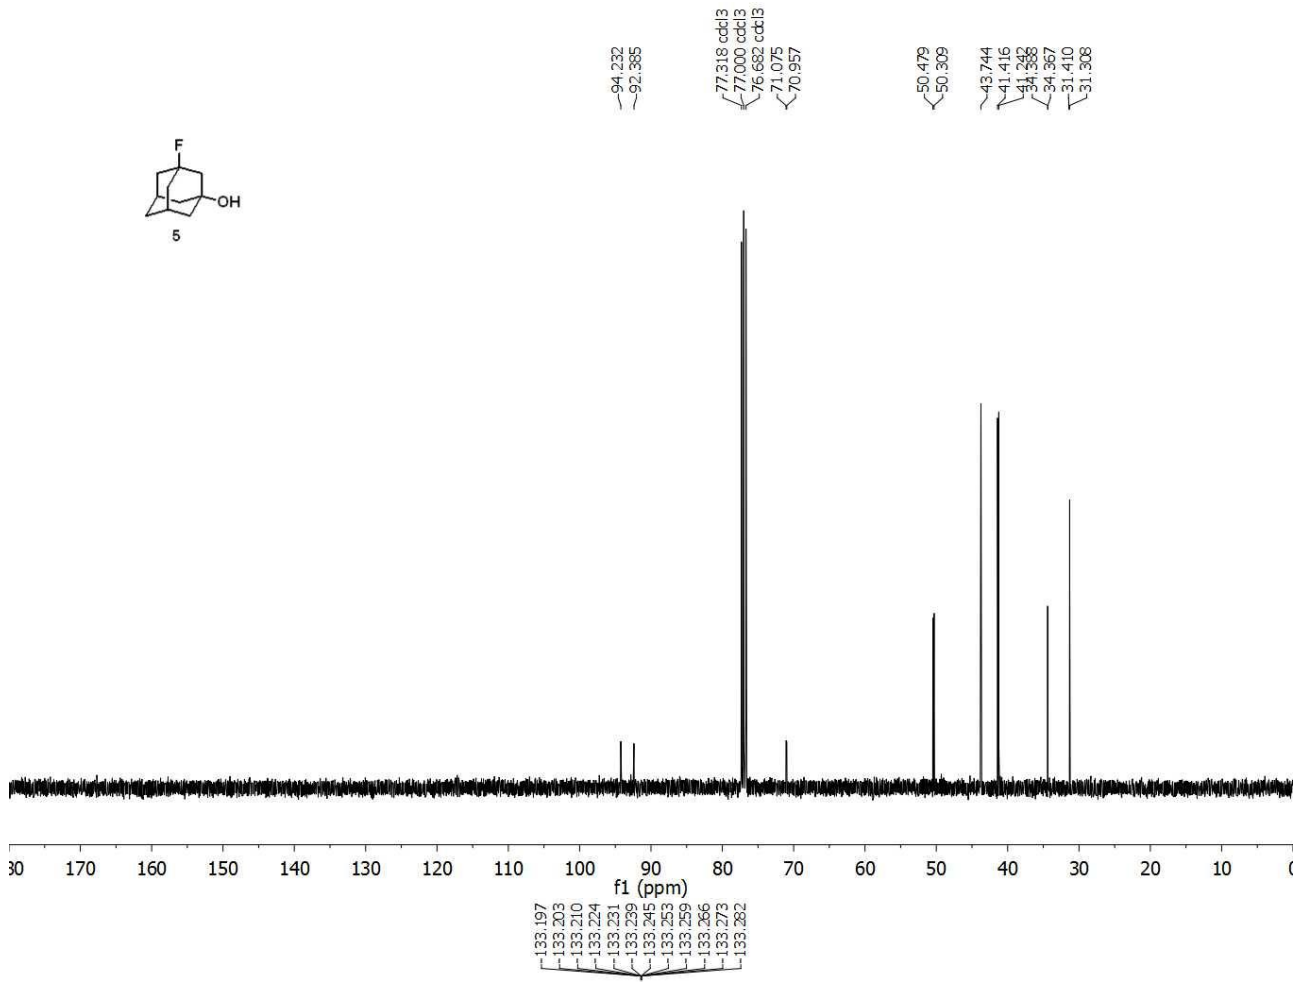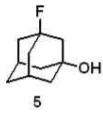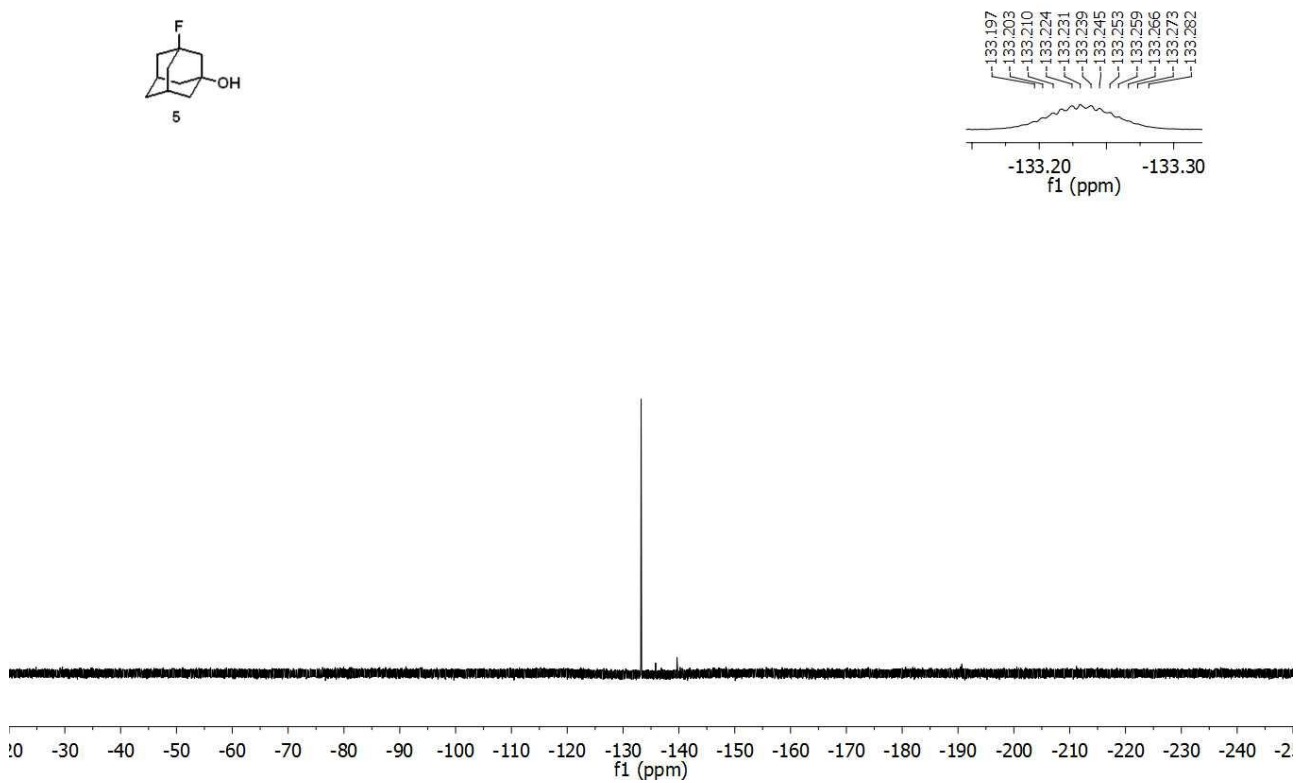

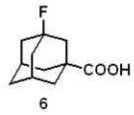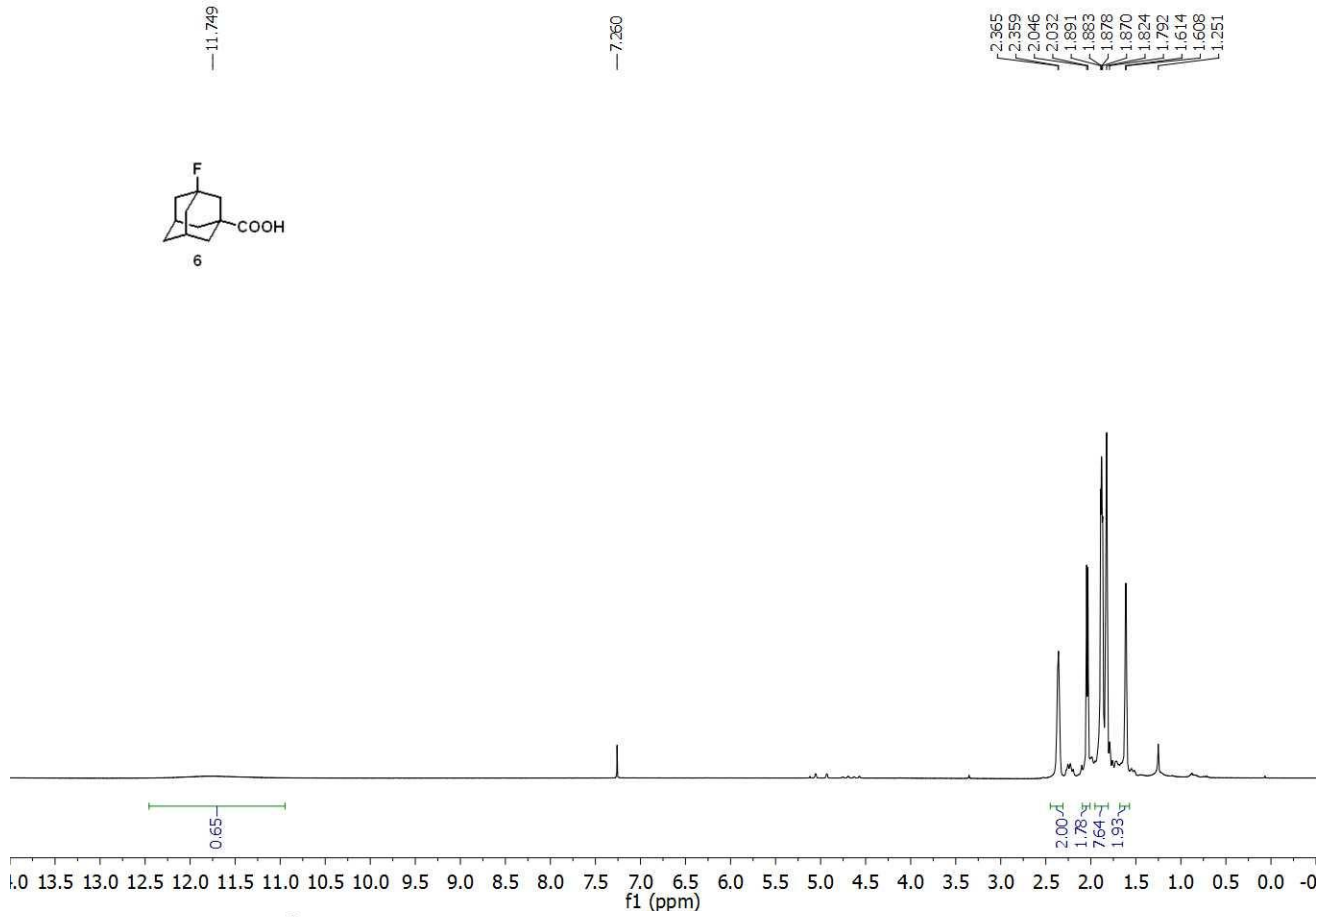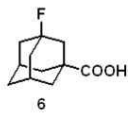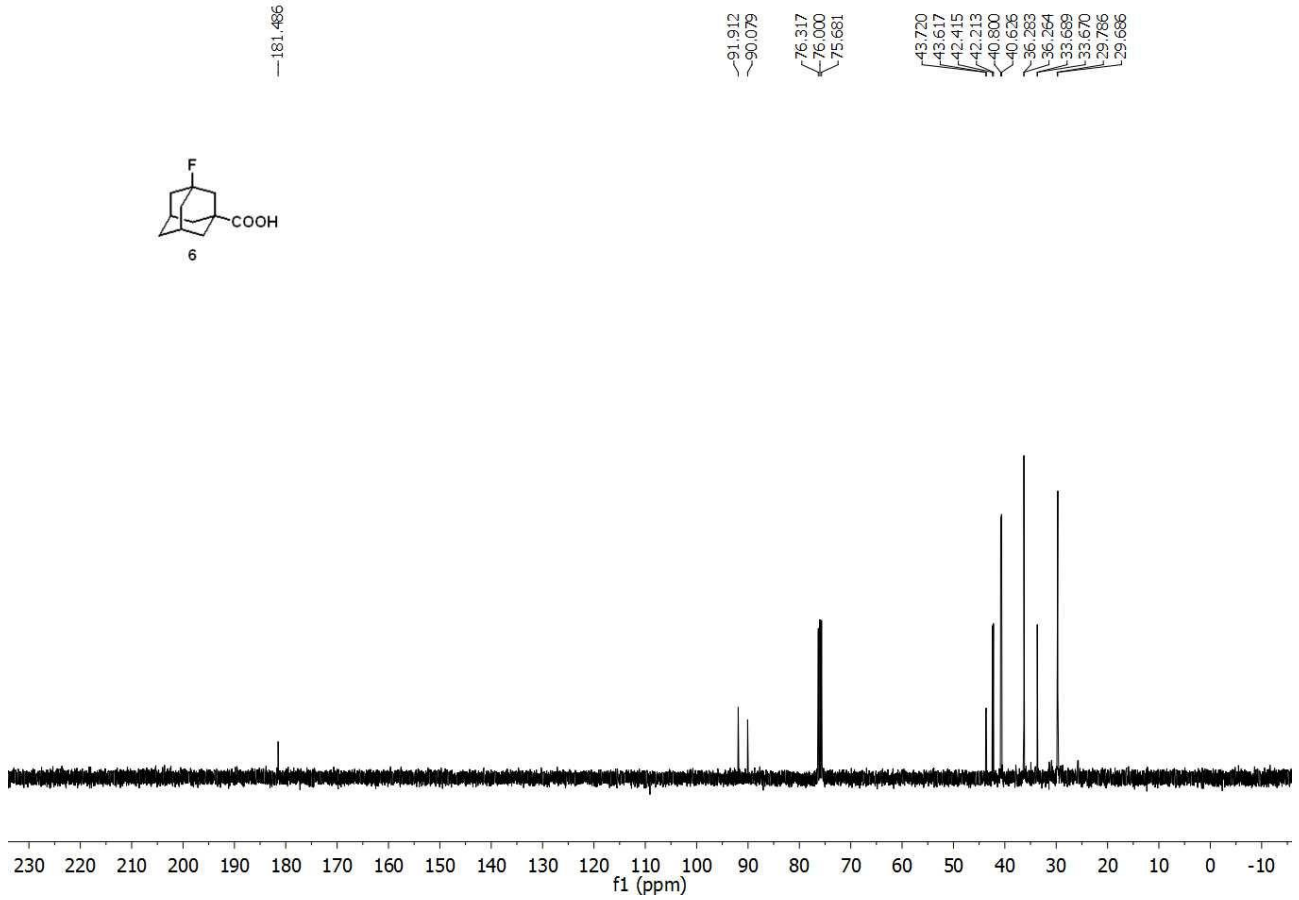

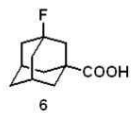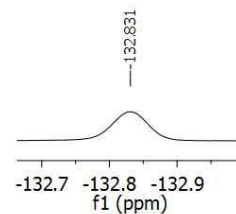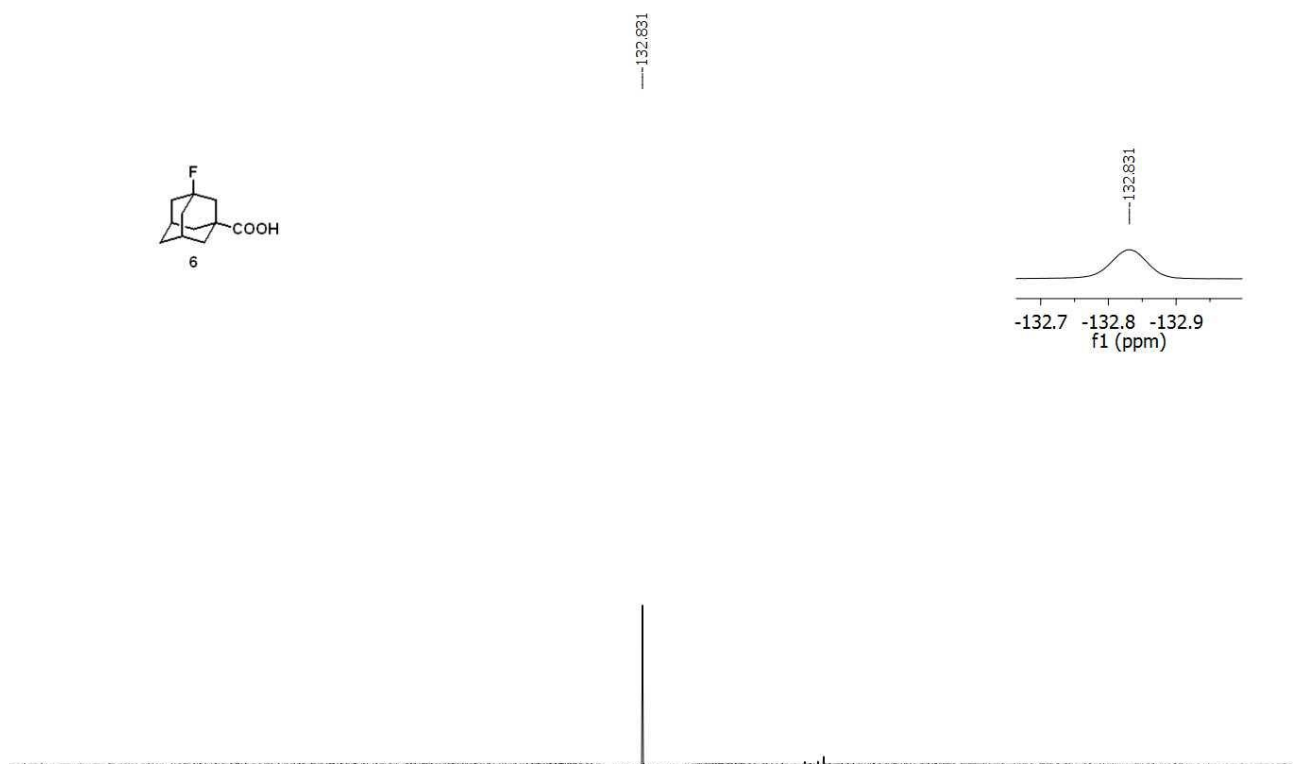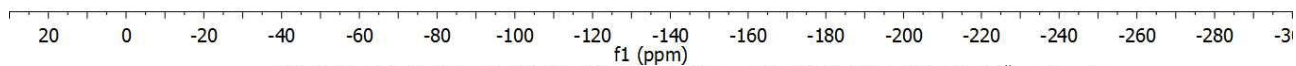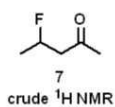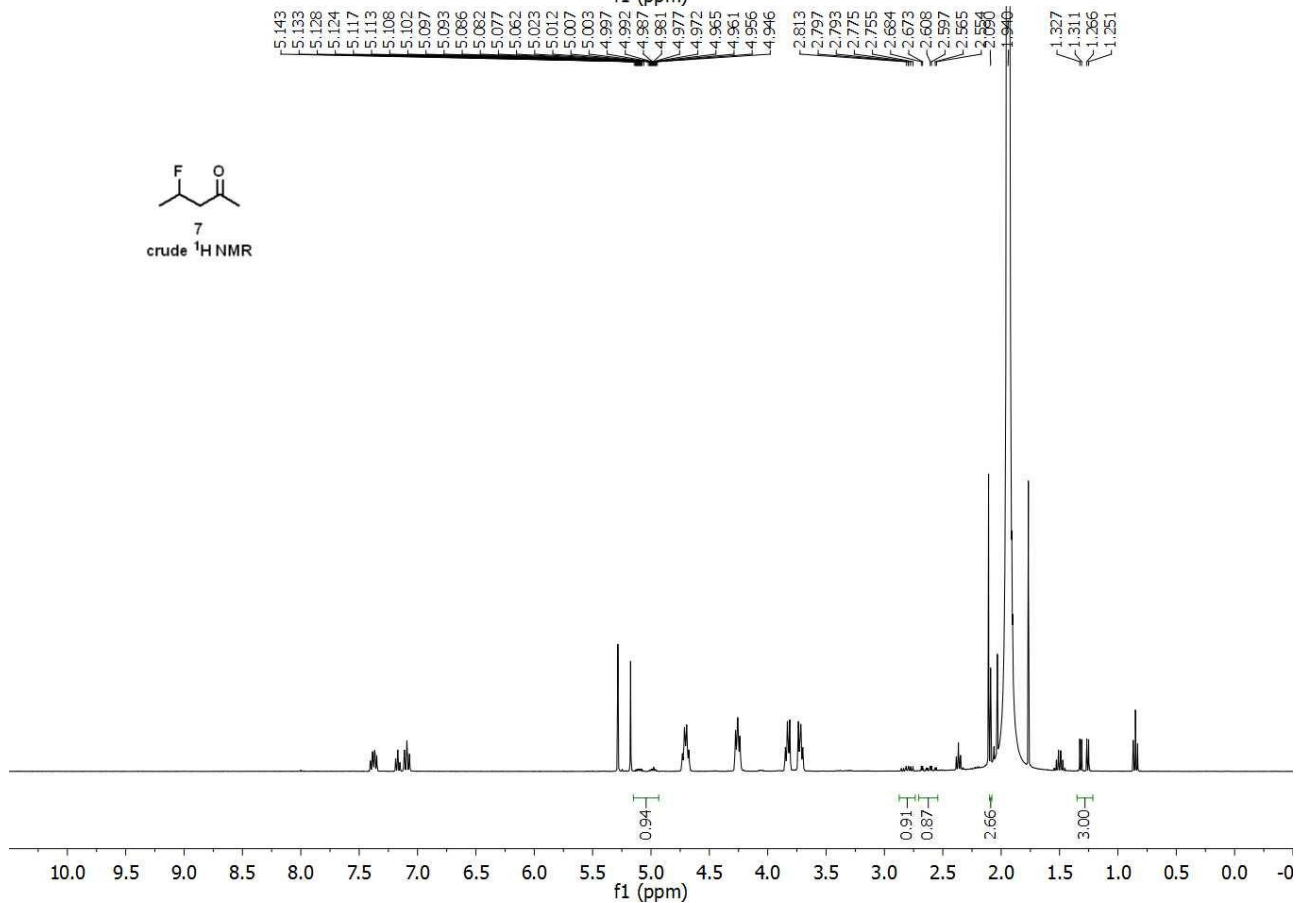

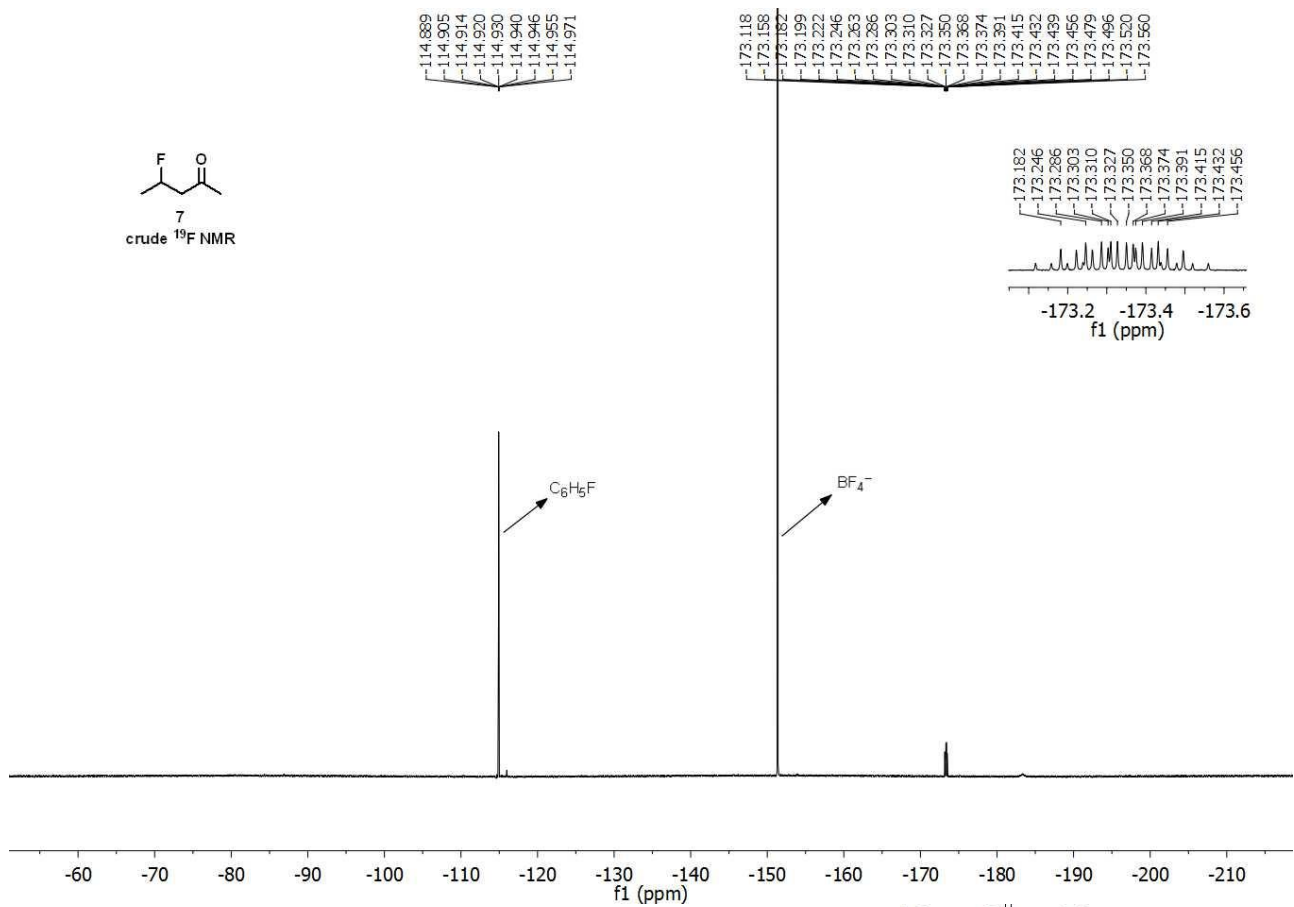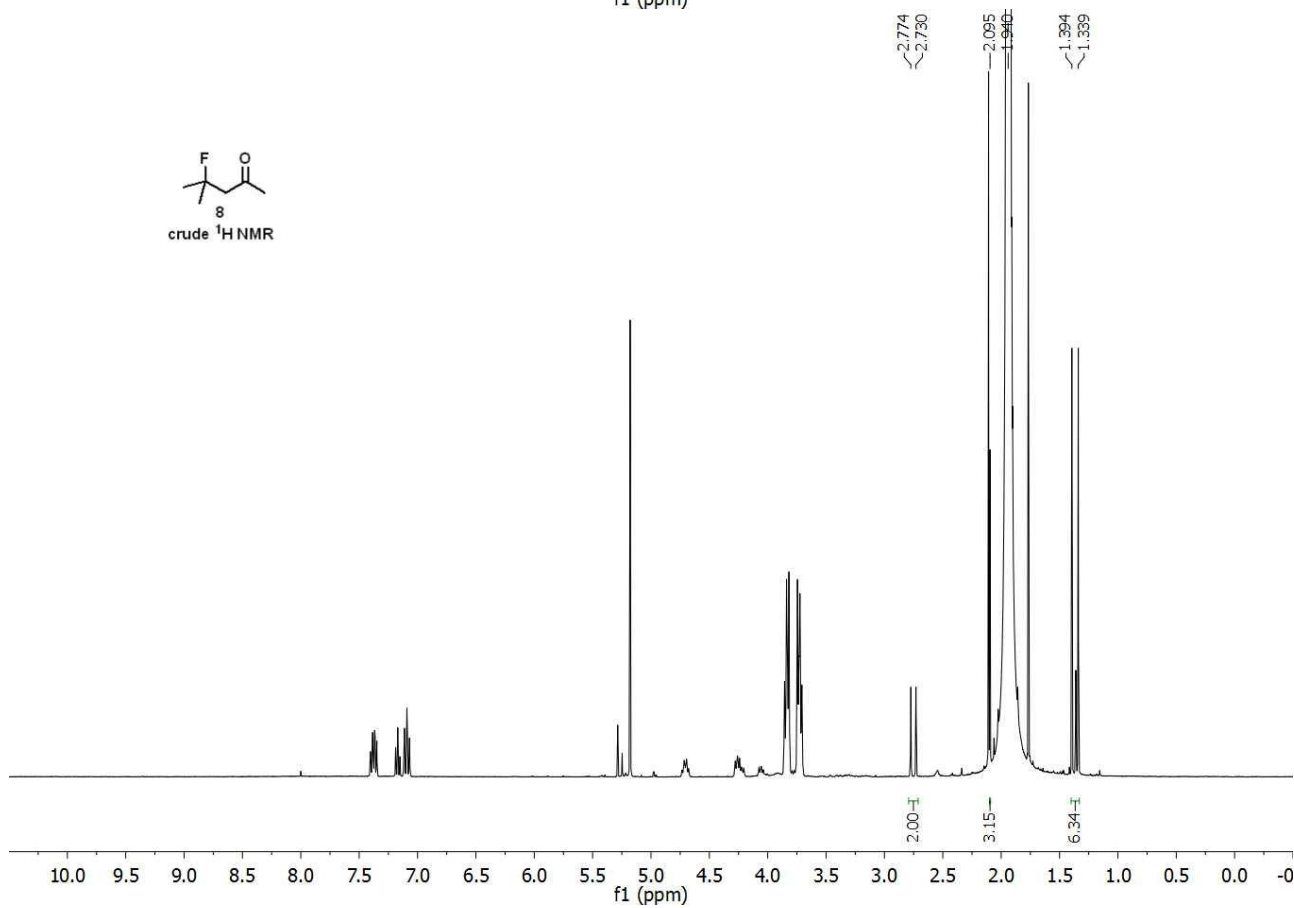

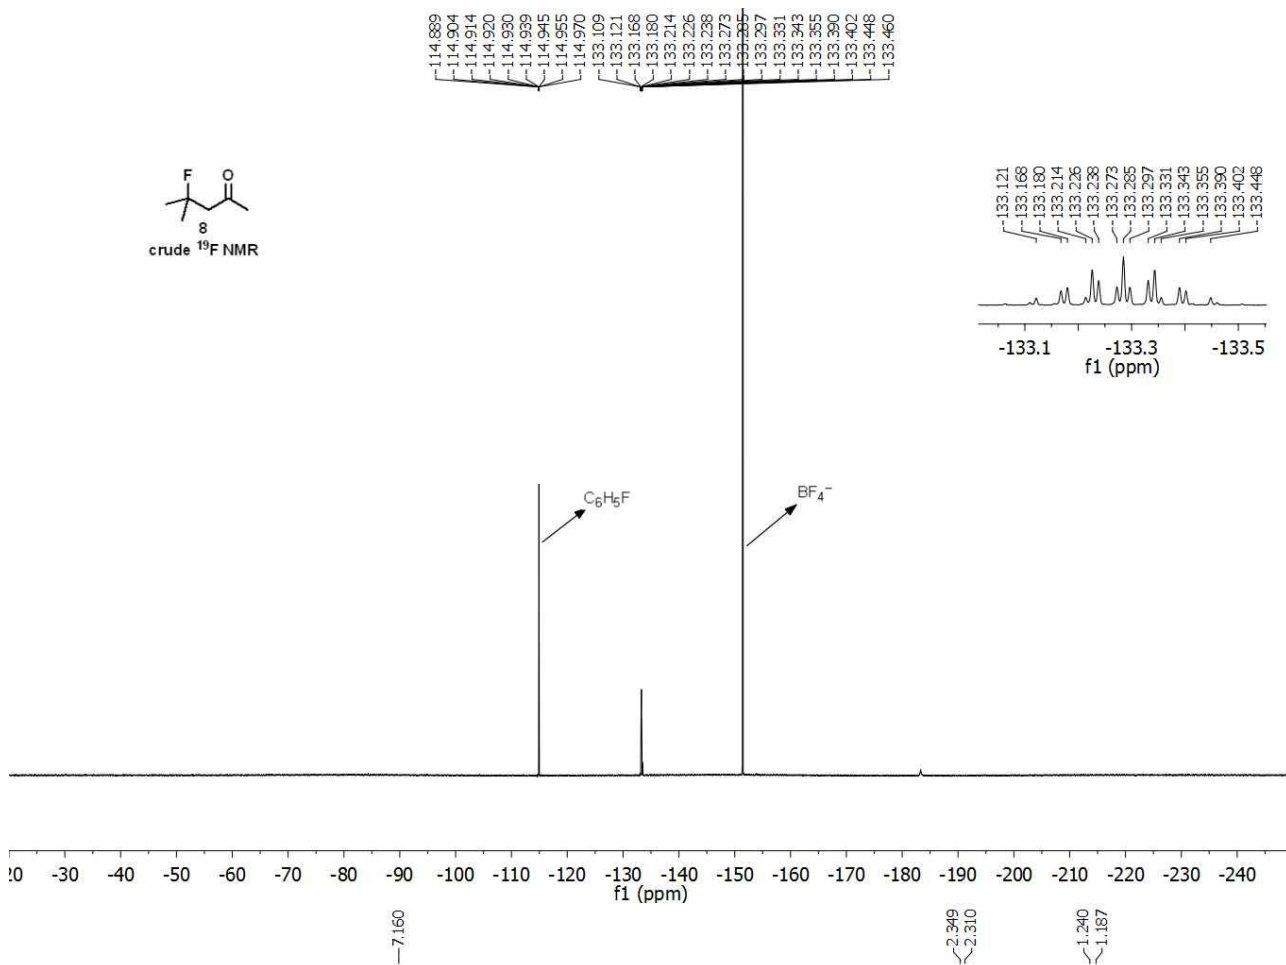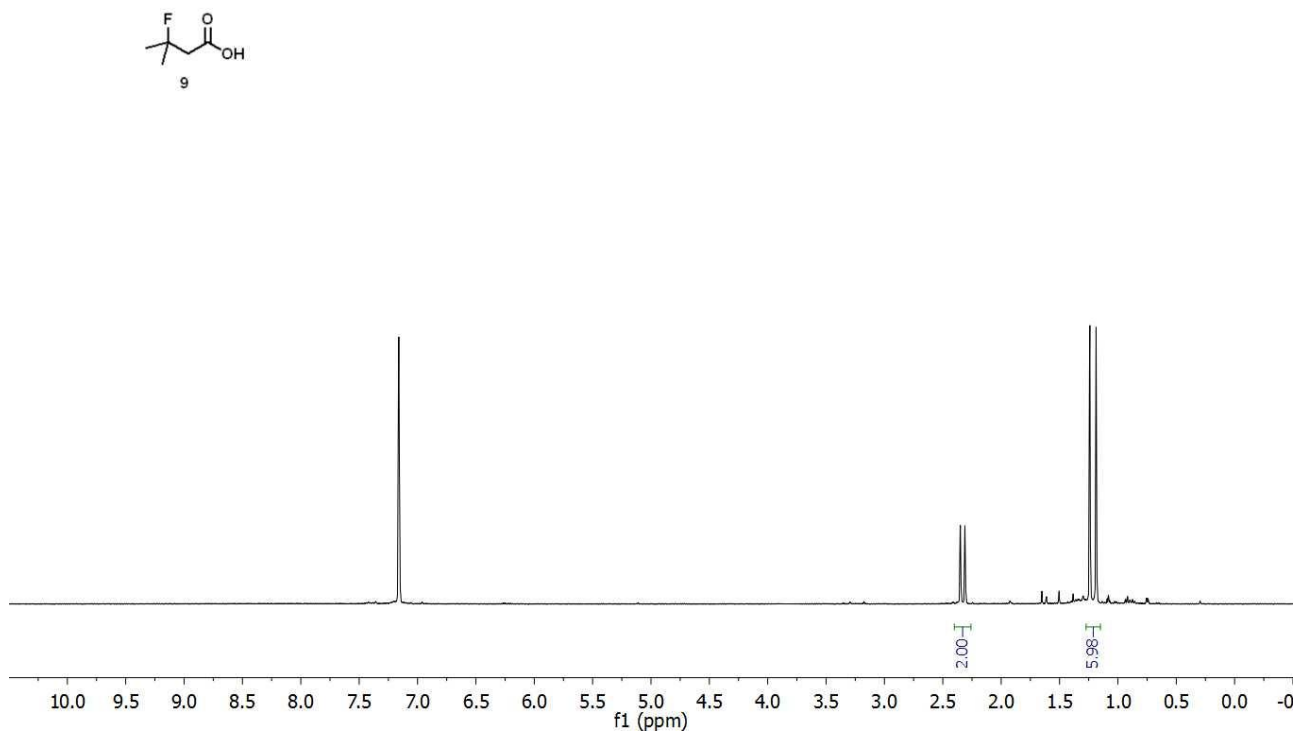

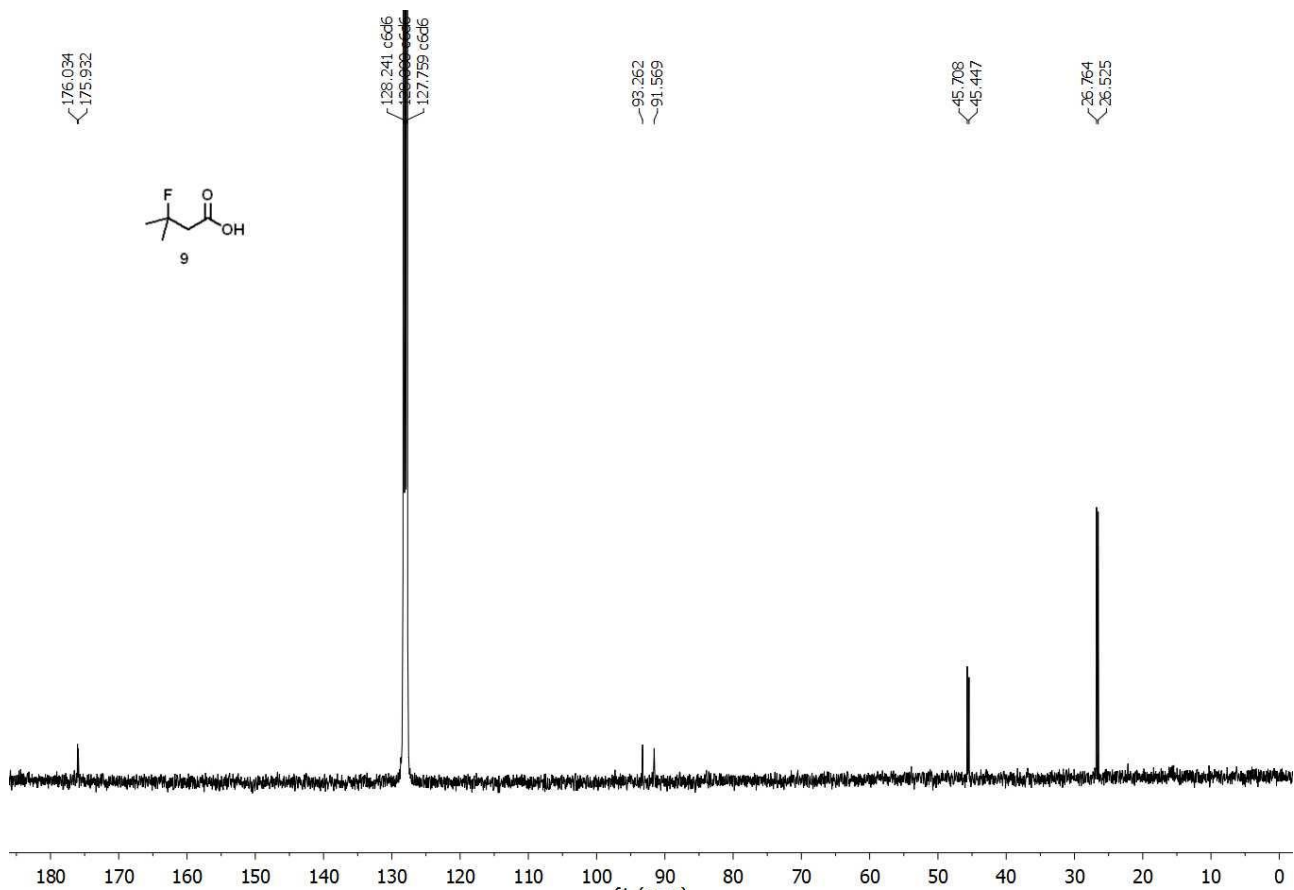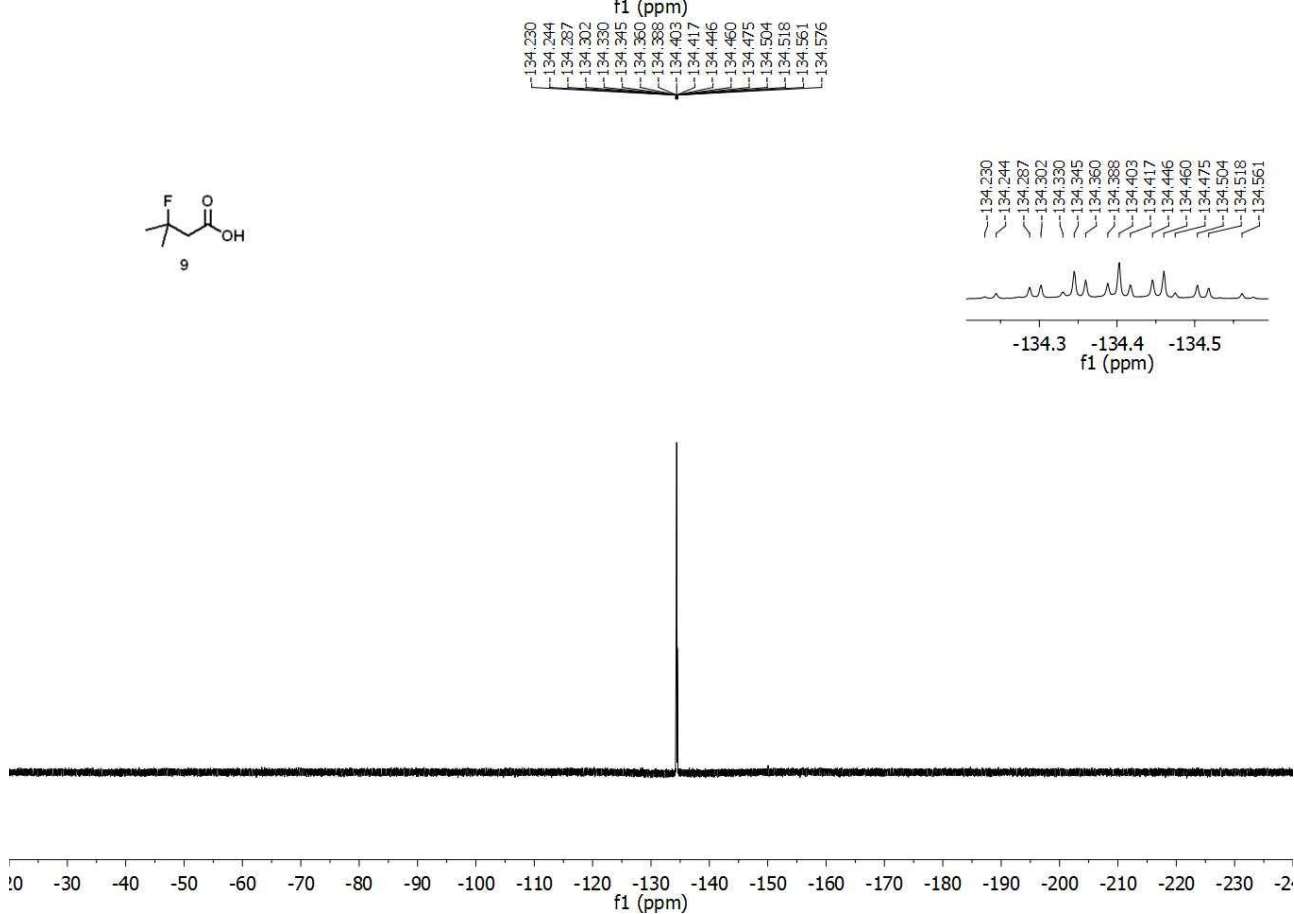



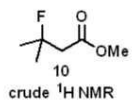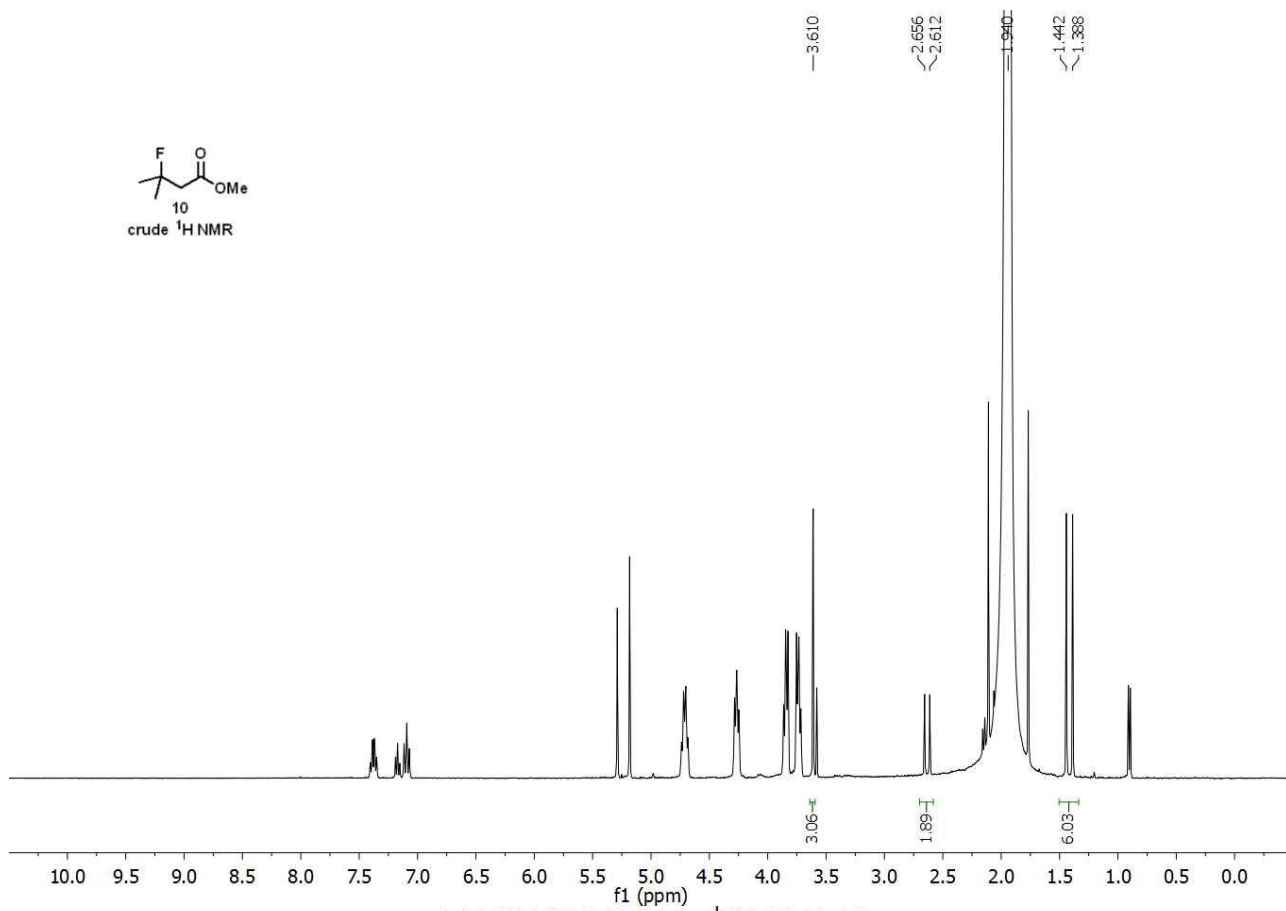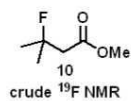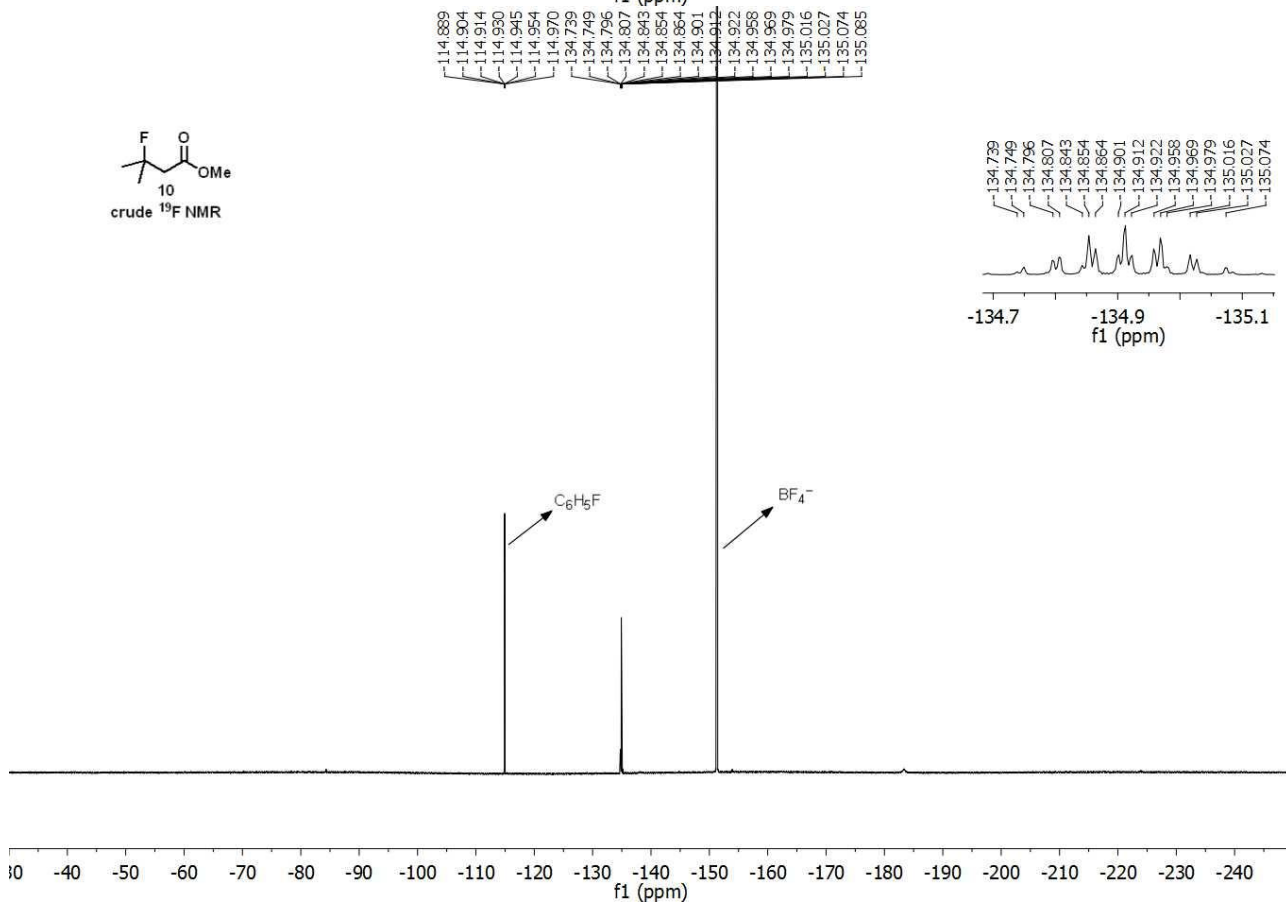

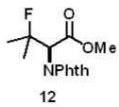

7.904  
 7.896  
 7.890  
 7.882  
 7.775  
 7.767  
 7.761  
 7.754  
 7.260  
 4.998  
 4.973  
 3.721  
 1.722  
 1.665  
 1.578  
 1.522

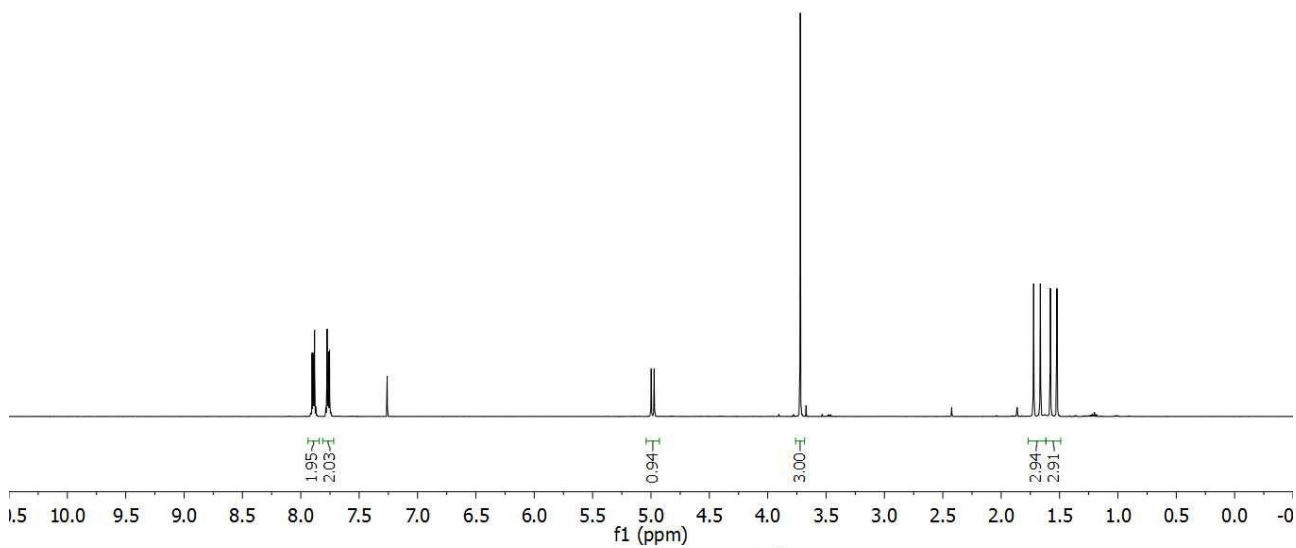

167.342  
 166.715  
 166.611  
 134.331  
 131.653  
 123.726  
 96.453  
 94.732  
 77.318 cdd13  
 77.000 cdd13  
 76.682 cdd13  
 57.824  
 57.566  
 52.539  
 26.395  
 26.168  
 23.888  
 23.652

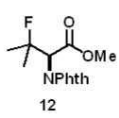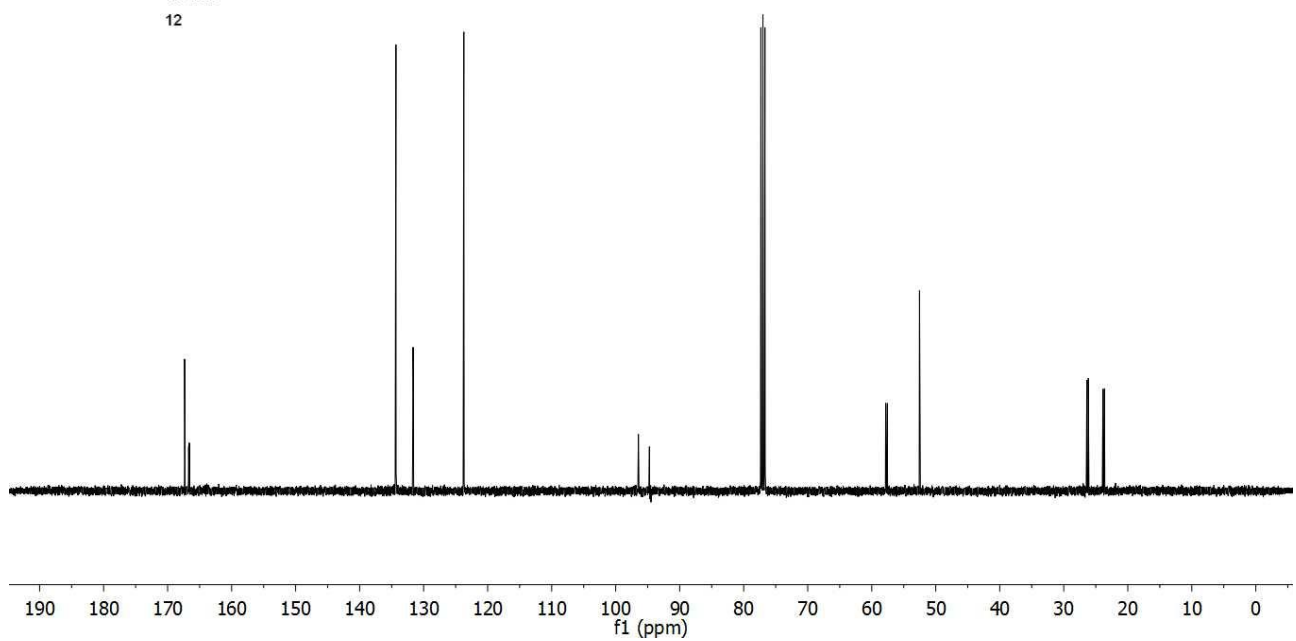

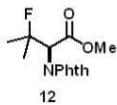

136.325  
 136.352  
 136.386  
 136.413  
 136.446  
 136.473  
 136.506  
 136.533  
 136.566  
 136.593  
 136.626  
 136.653  
 136.686  
 136.713

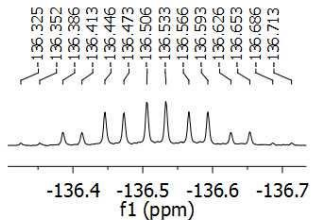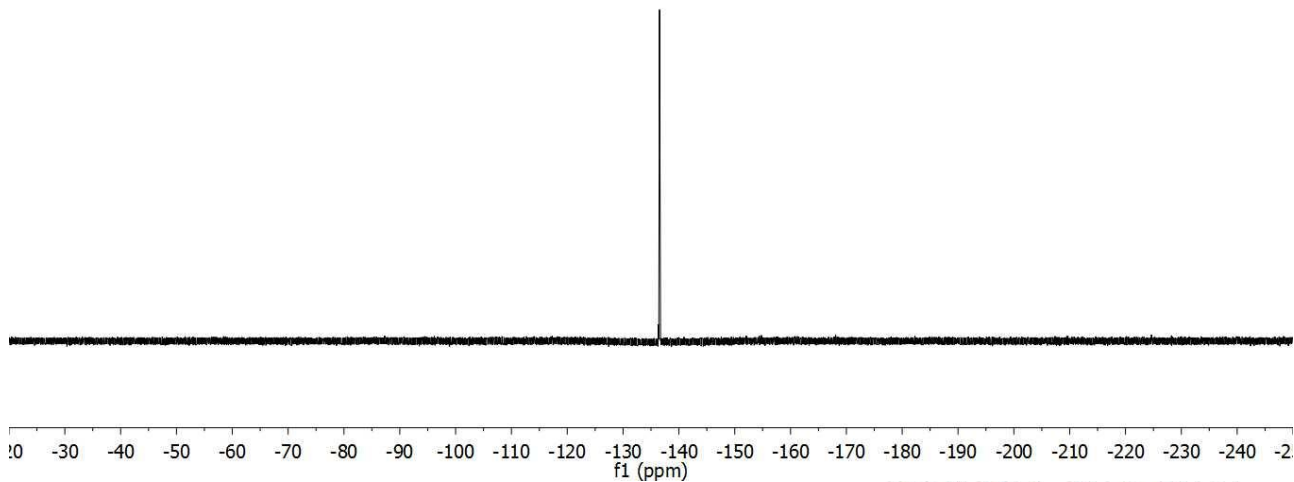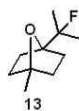

1.841  
 1.818  
 1.803  
 1.778  
 1.764  
 1.455  
 1.409  
 1.390  
 1.367  
 1.363  
 1.361  
 1.339  
 1.328  
 1.310  
 1.308  
 1.297  
 1.285  
 1.278  
 1.269  
 1.249  
 1.236

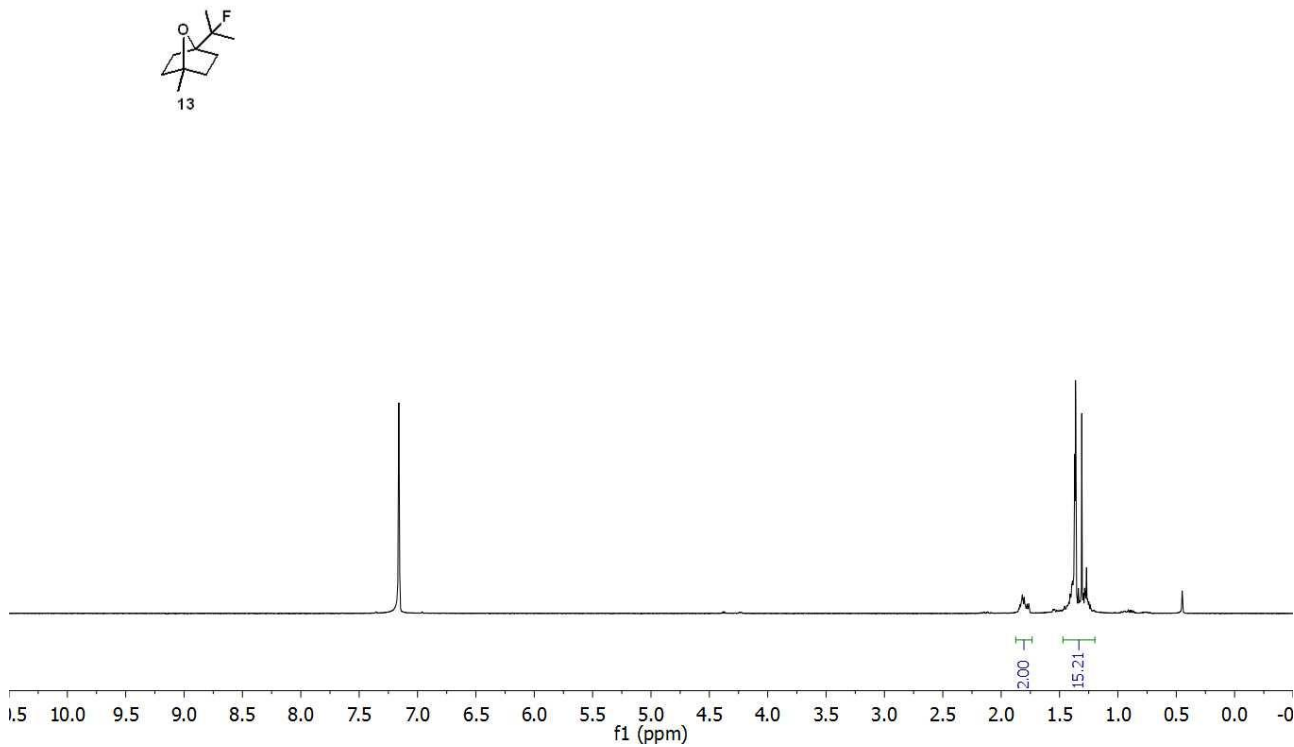

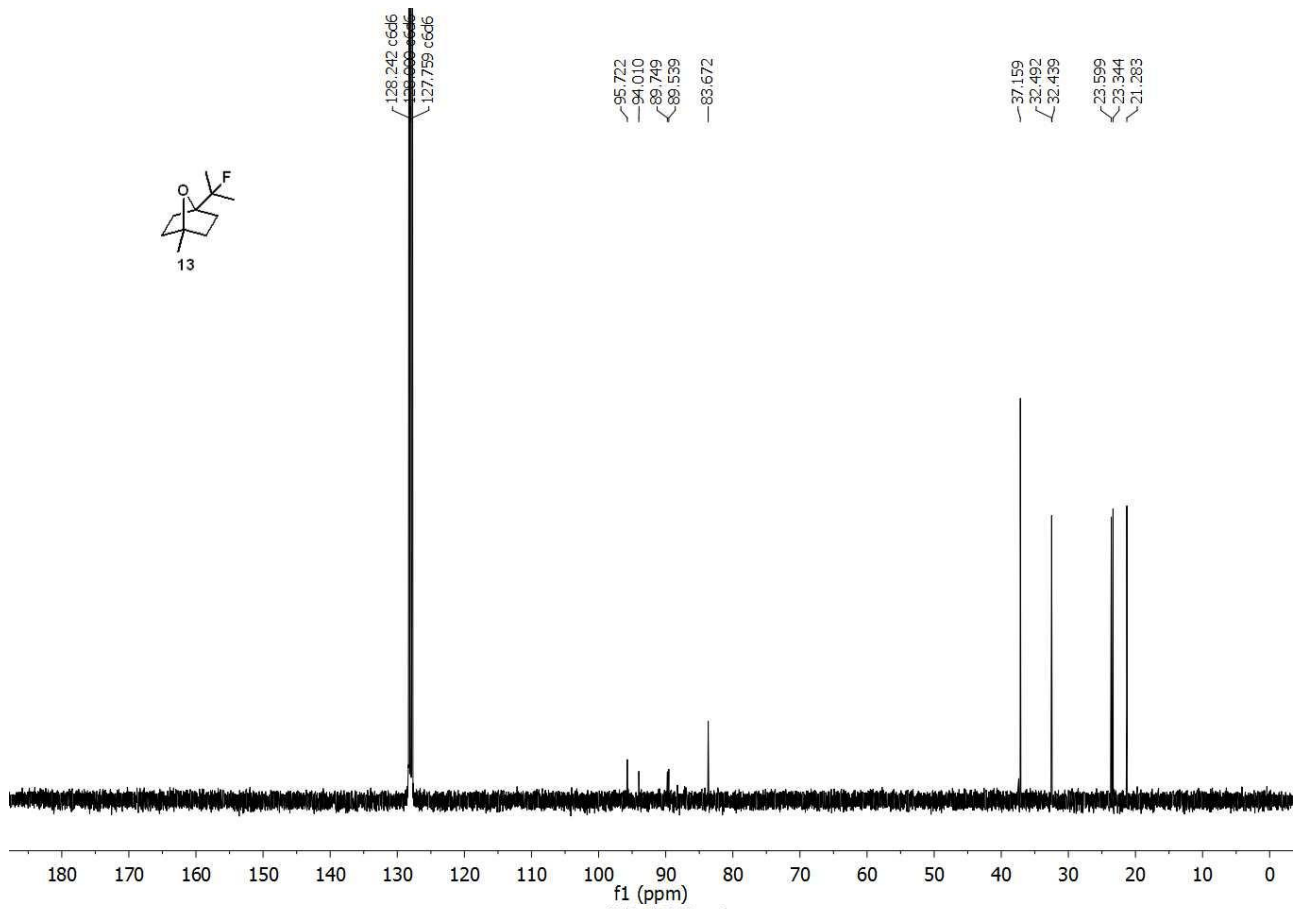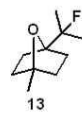

f1 (ppm)

146.068  
146.125  
146.182  
146.238  
146.295  
146.351  
146.409

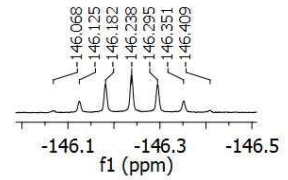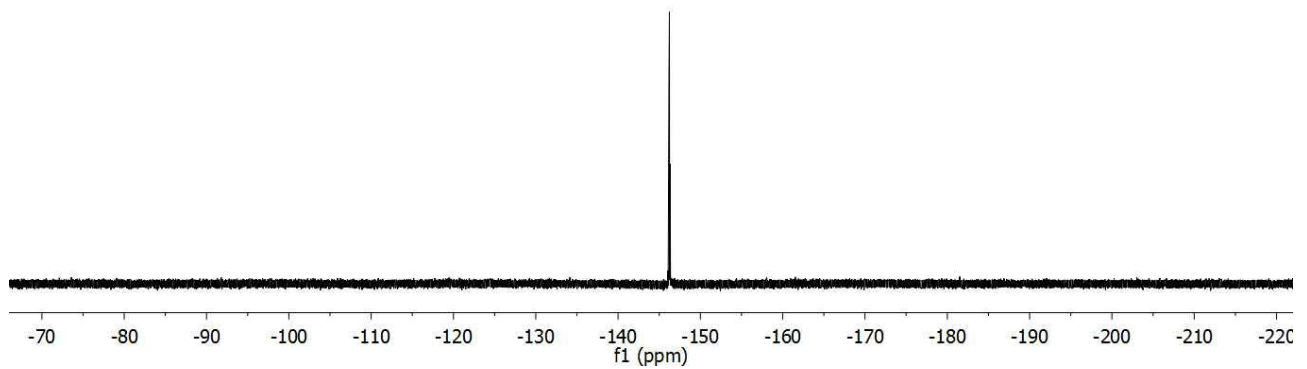

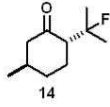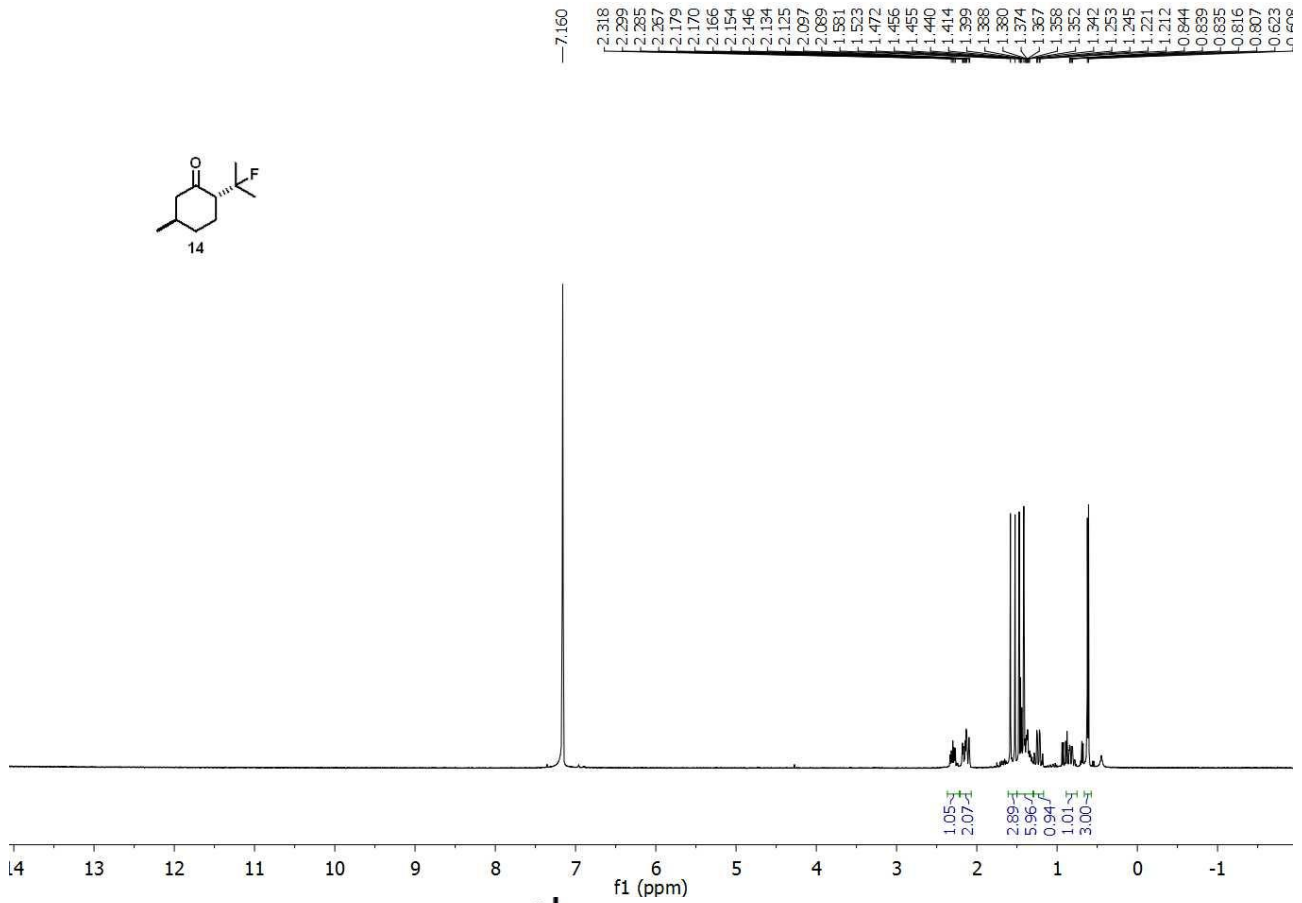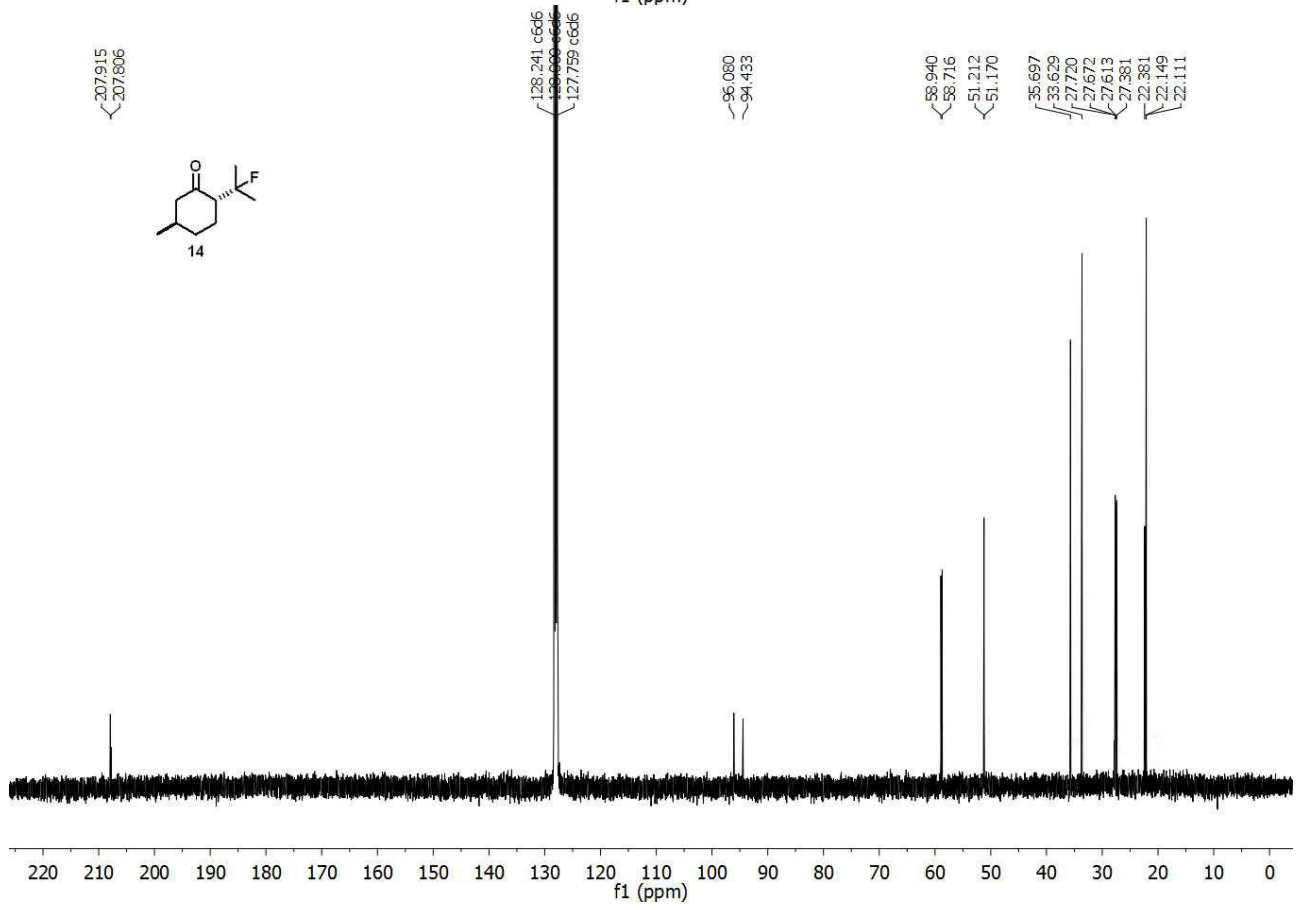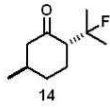

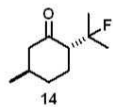

133.561  
133.581  
133.622  
133.642  
133.684  
133.703  
133.745  
133.764  
133.806  
133.825  
133.867  
133.887  
133.928  
133.948

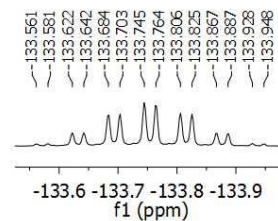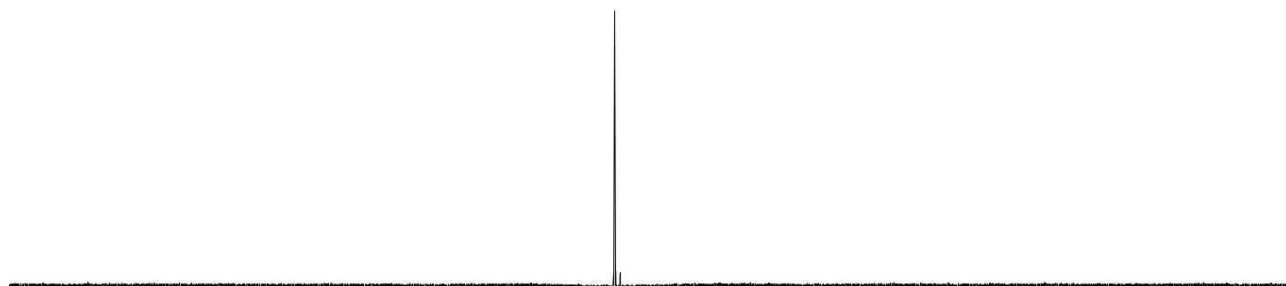

10 -40 -50 -60 -70 -80 -90 -100 -110 -120 -130 -140 -150 -160 -170 -180 -190 -200 -210 -220 -230 -240  
f1 (ppm)

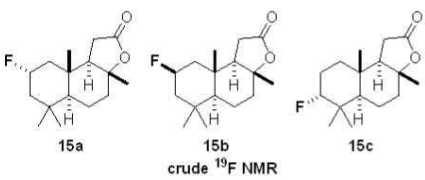

crude <sup>19</sup>F NMR

114.889  
114.904  
114.914  
114.920  
114.930  
114.945  
114.955  
114.970  
171.874  
171.912  
171.968  
171.989  
172.004  
172.029  
172.042  
172.083  
172.135  
172.158  
172.172  
172.213  
172.248  
172.268  
179.160  
179.257  
187.424  
187.454  
187.548  
187.581

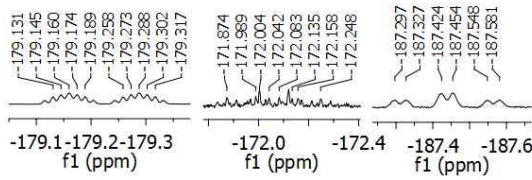

C<sub>6</sub>H<sub>5</sub>F

BF<sub>4</sub><sup>-</sup>

-30 -40 -50 -60 -70 -80 -90 -100 -110 -120 -130 -140 -150 -160 -170 -180 -190 -200 -210 -220 -230 -240 -250  
f1 (ppm)

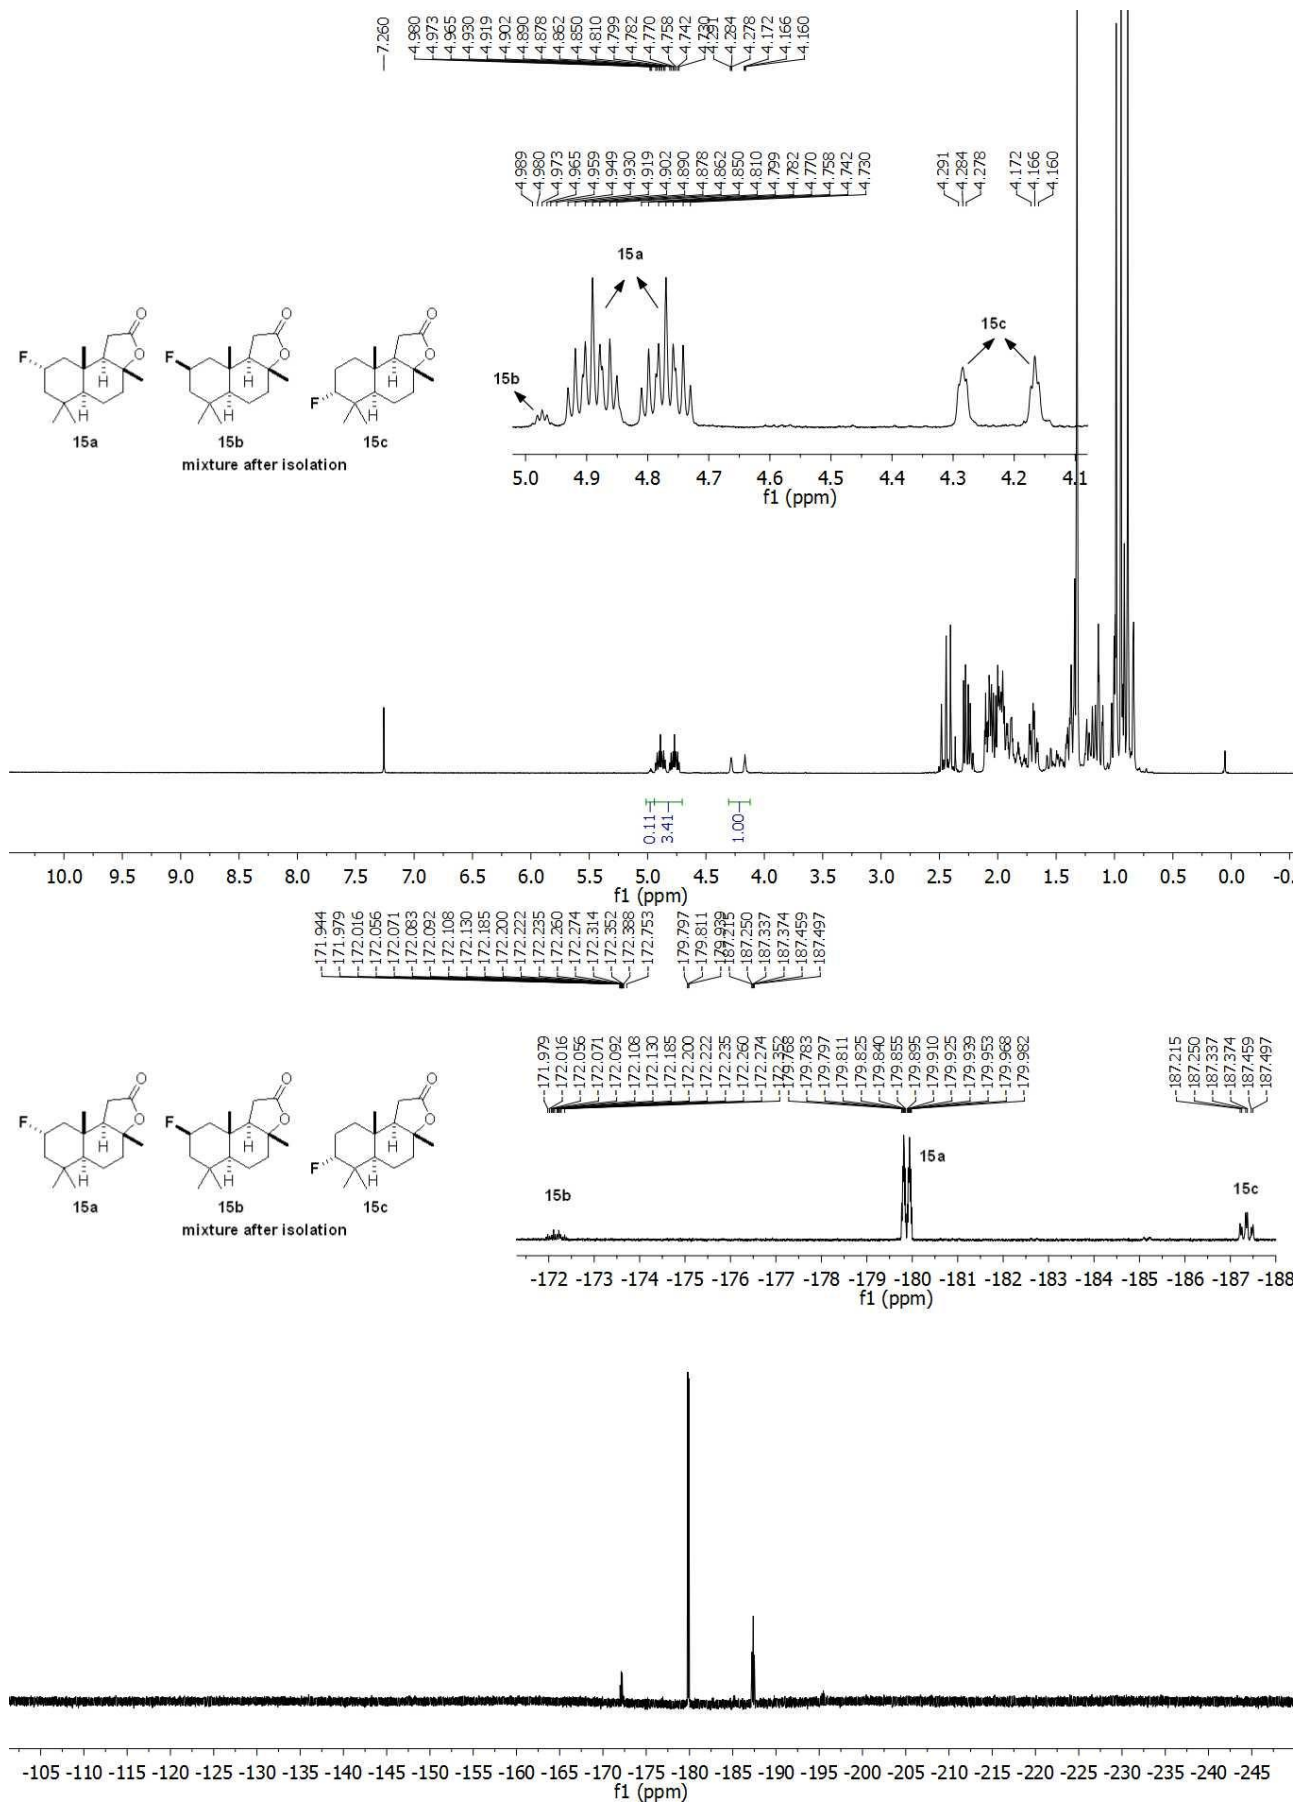

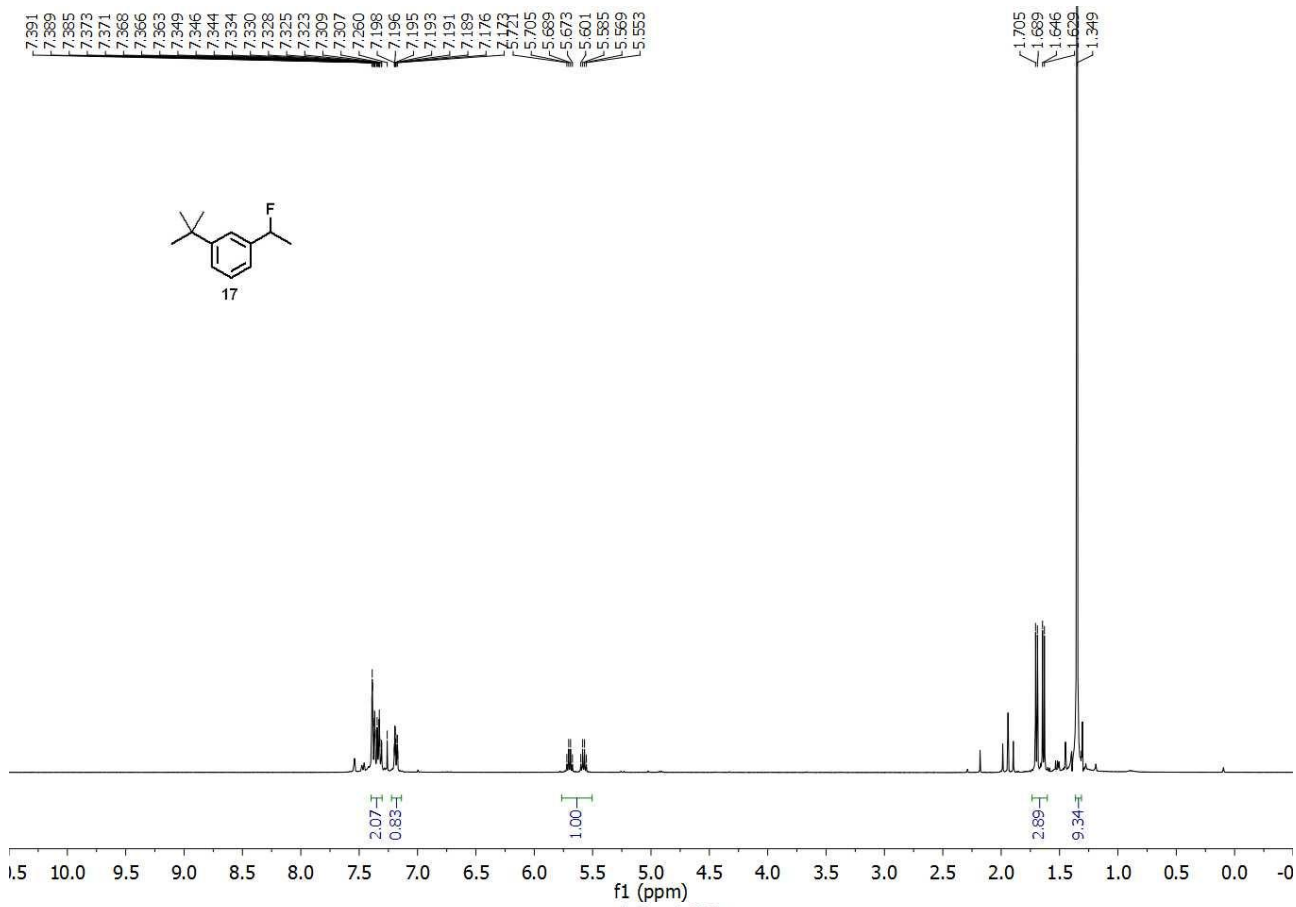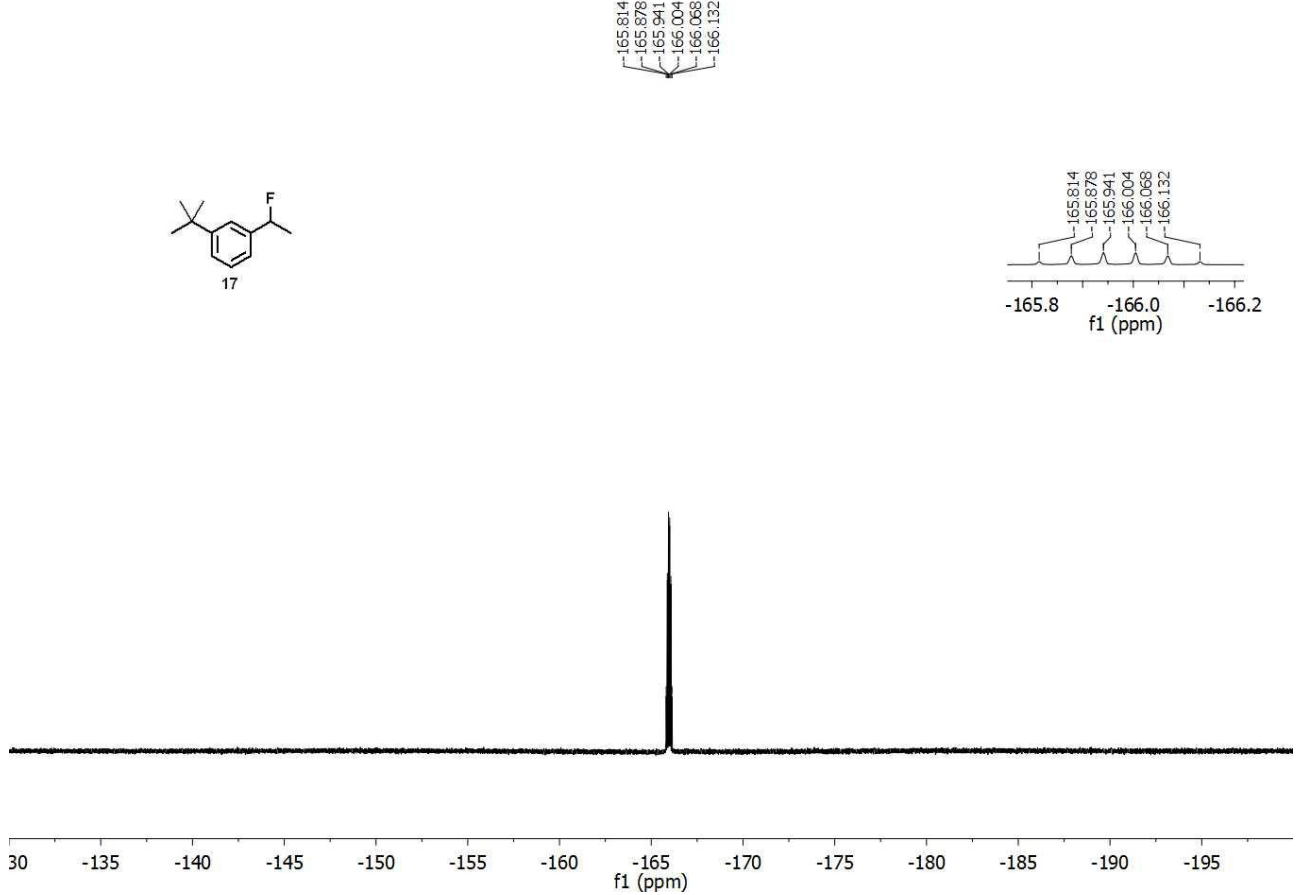



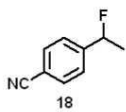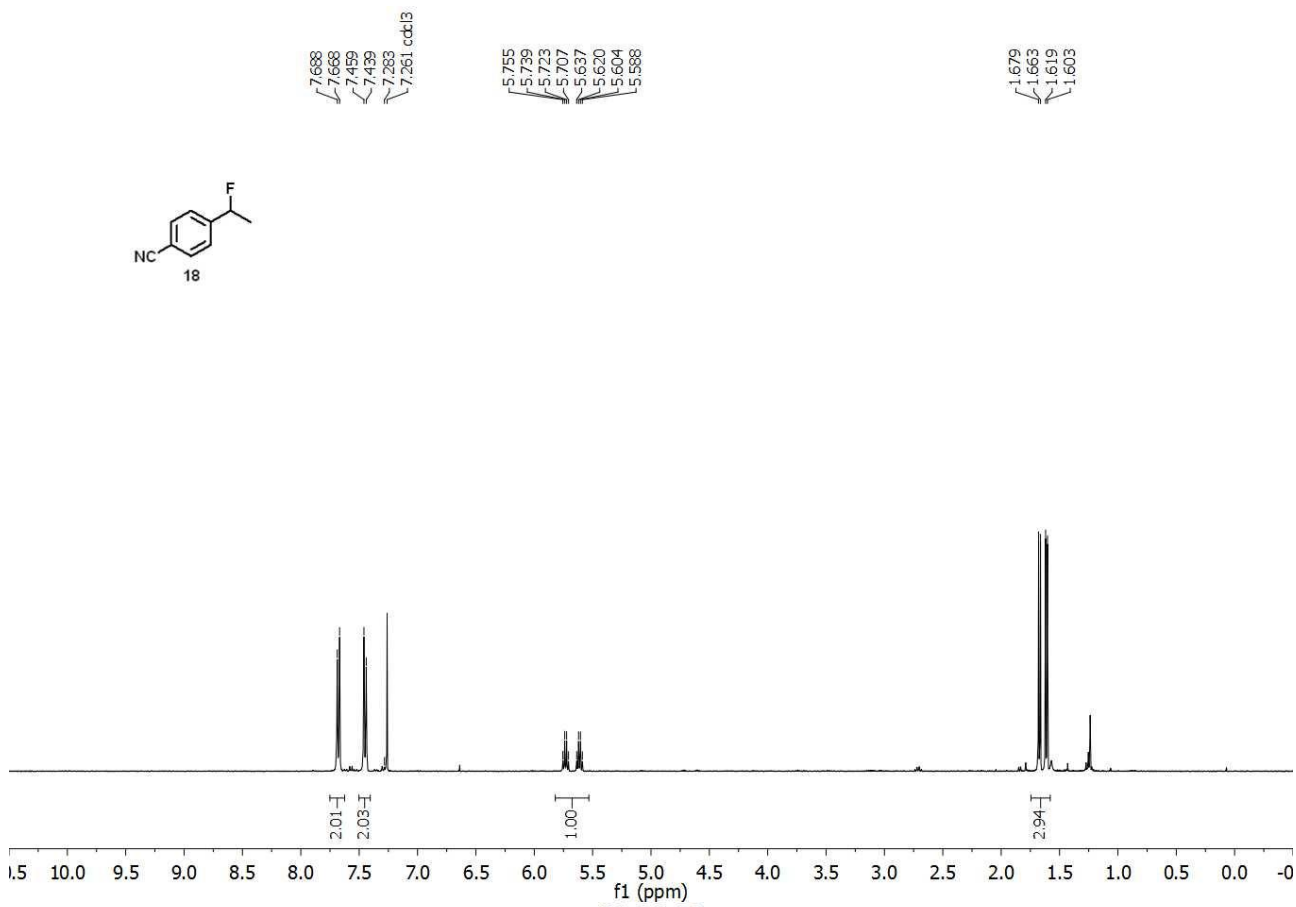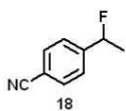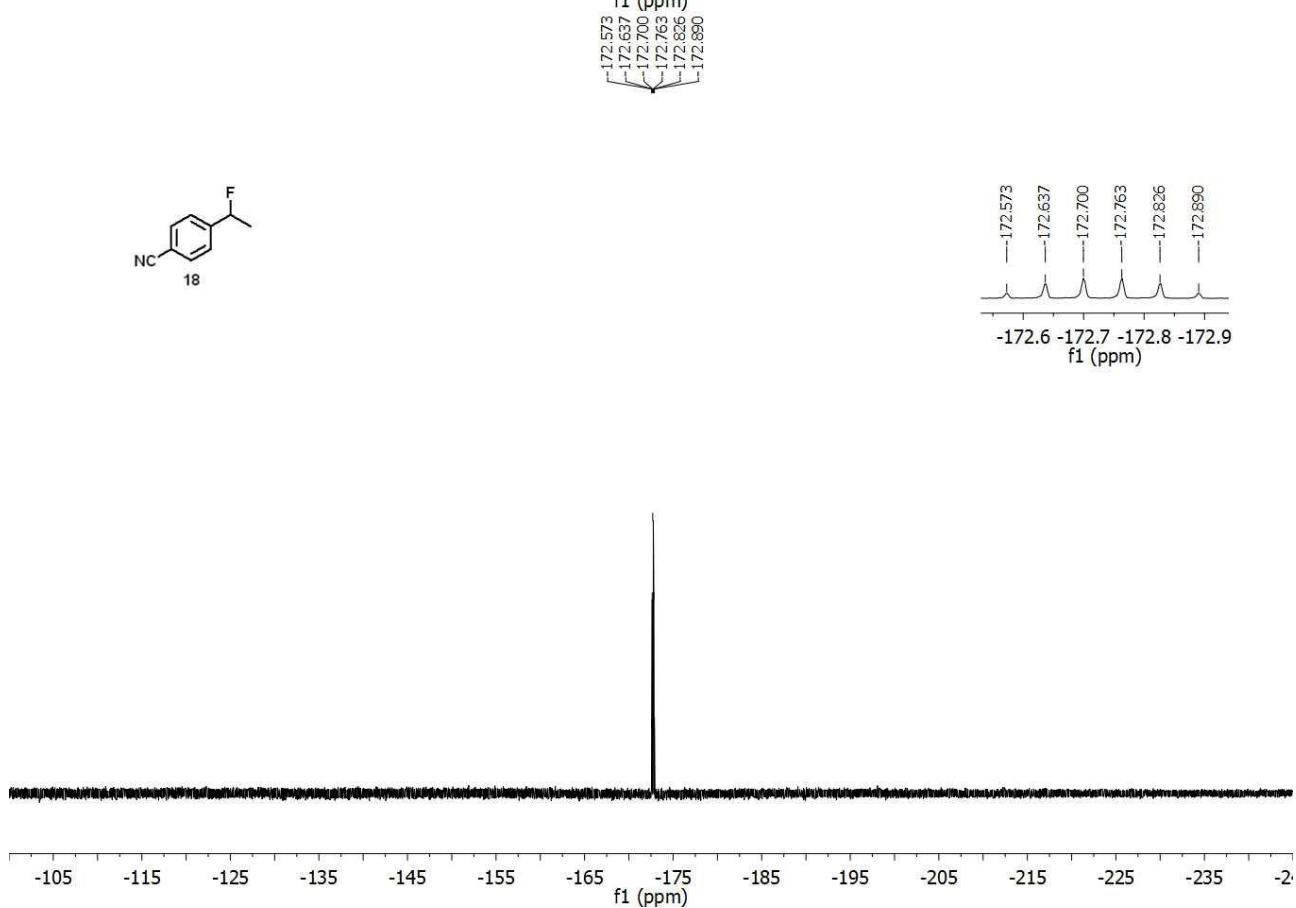

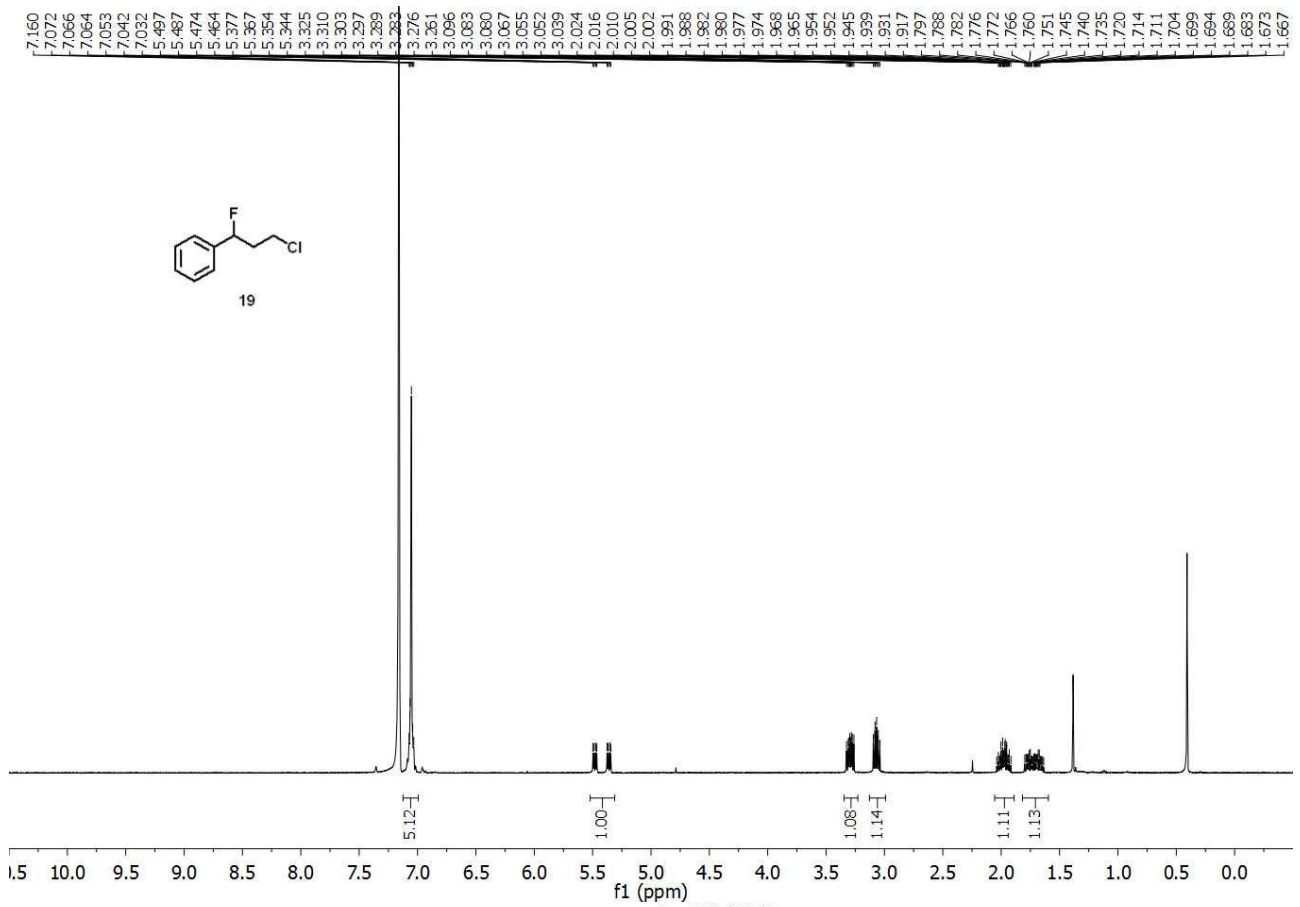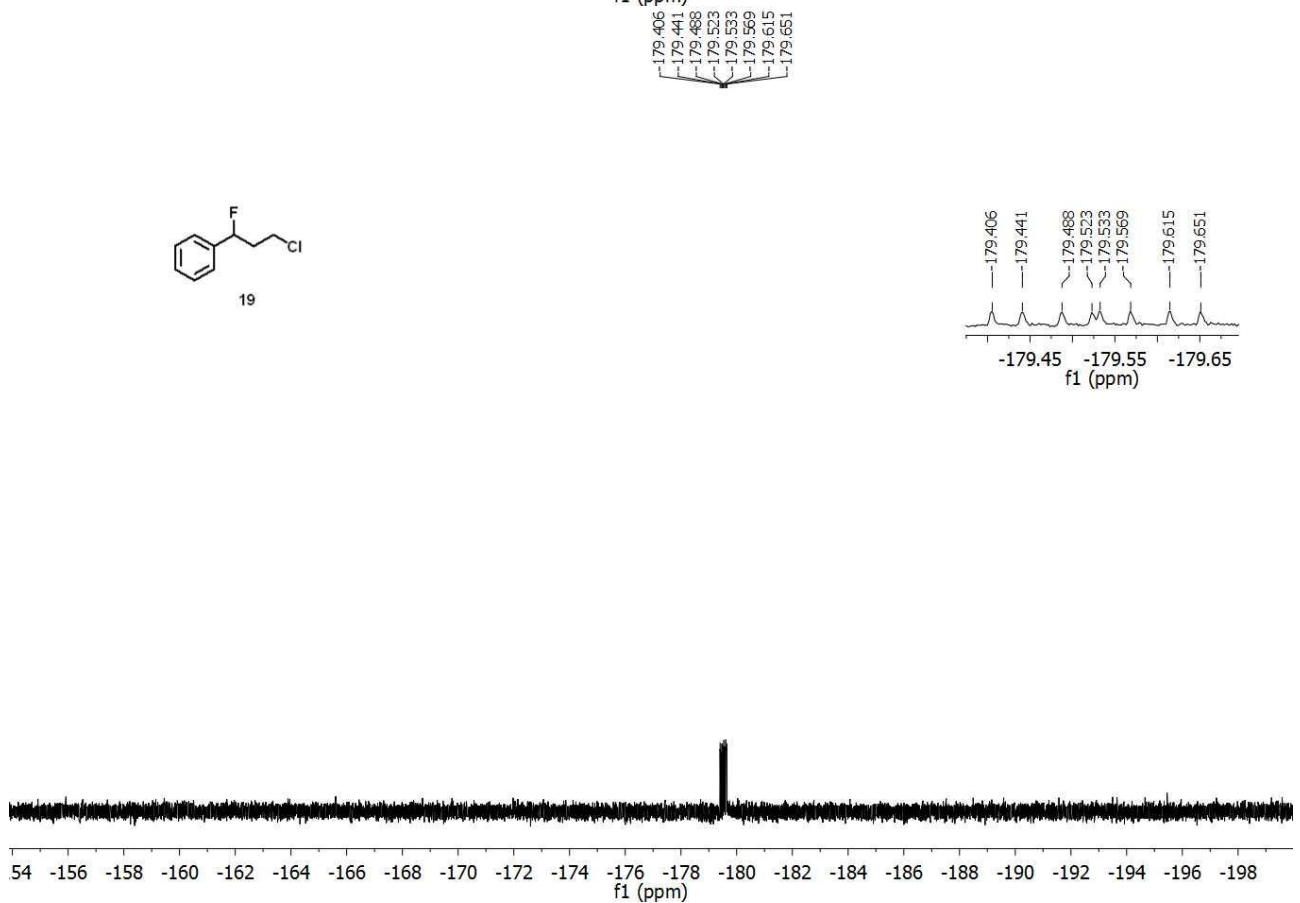

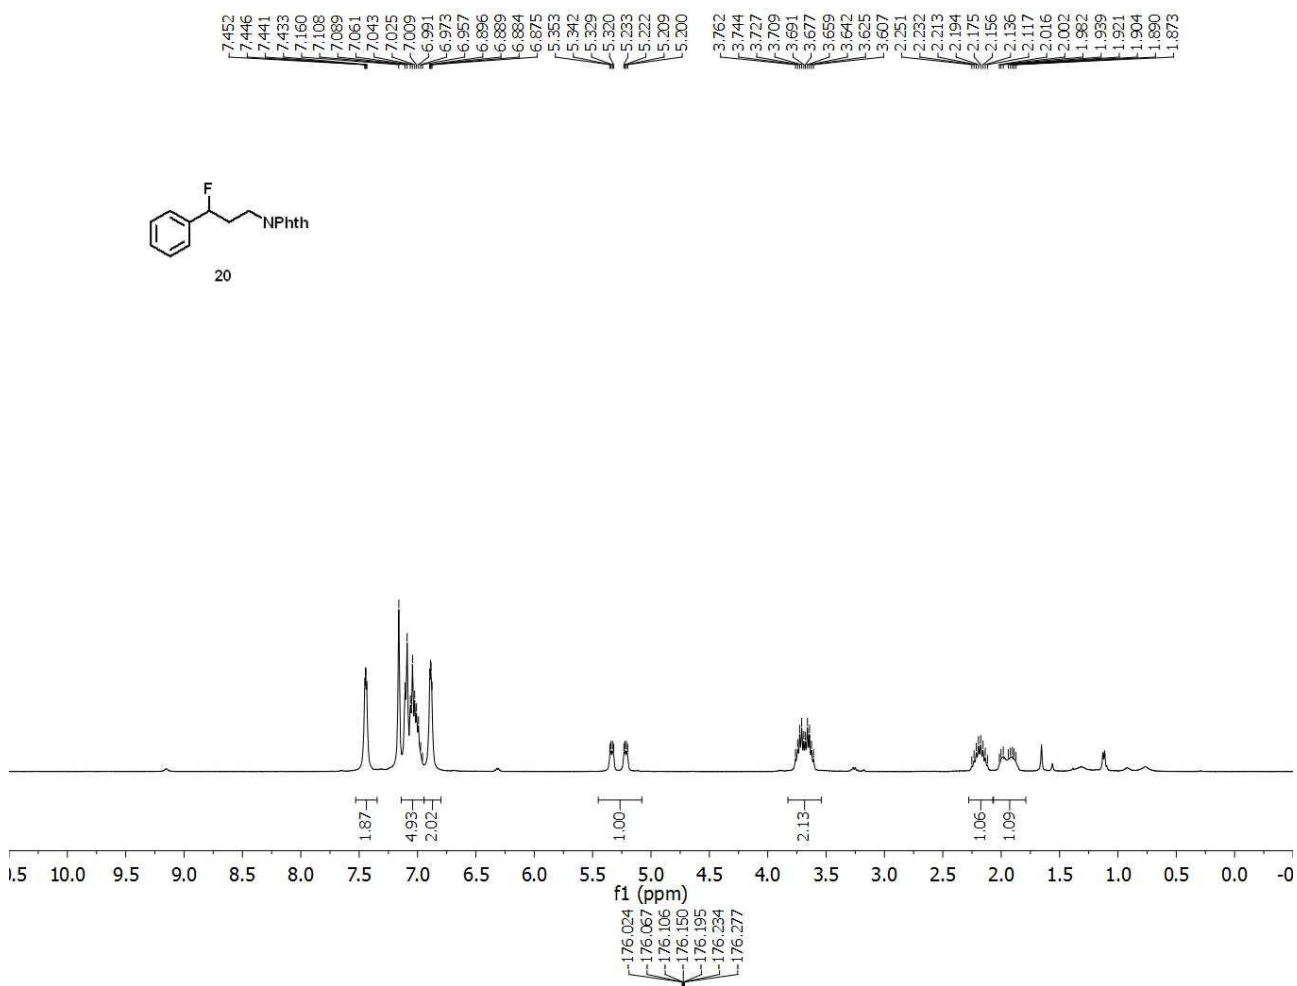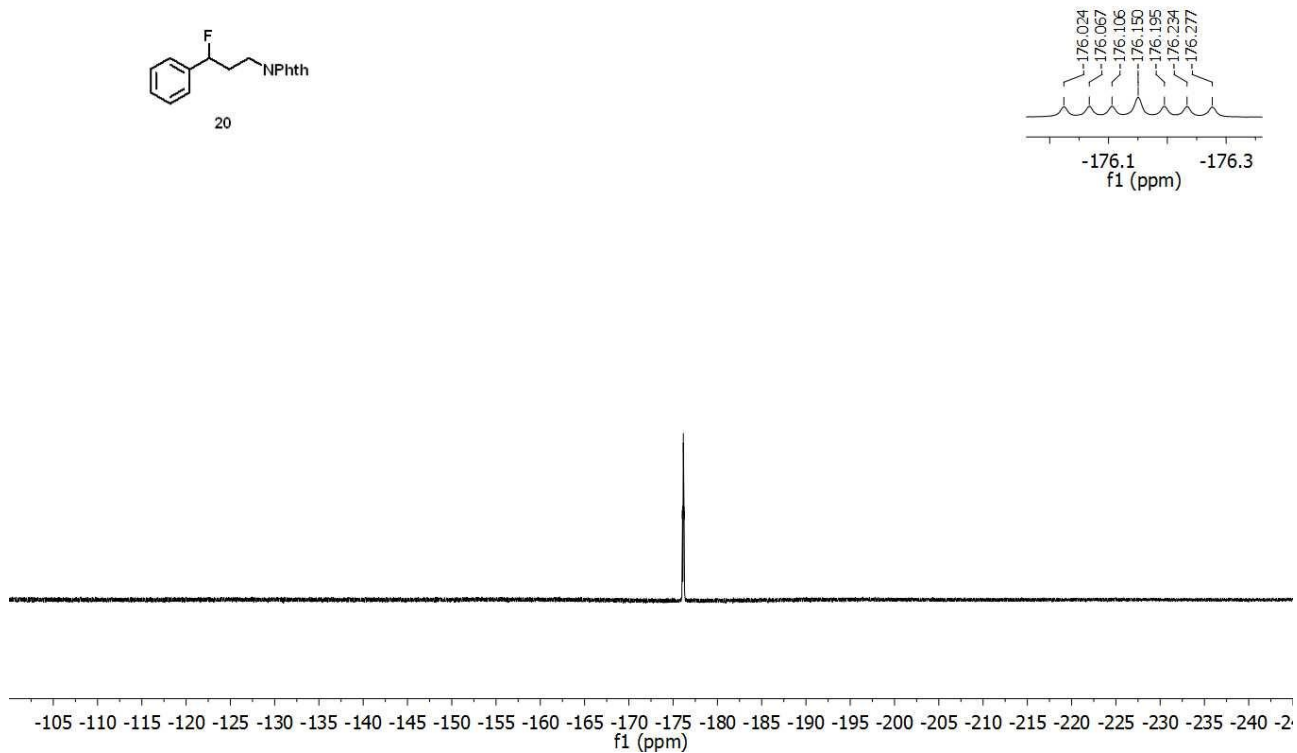

Supplement: NIHMS585791-supplement-ESI.pdf [file NIHMS585791-supplement-ESI.pdf]
